# Supplementary material
Source: PubMed Central journal article supplement (PMC3117400)

# 1aaq

source: *Homo sapiens*

protein: HIV-1 protease

ligand: PSI inhibitor

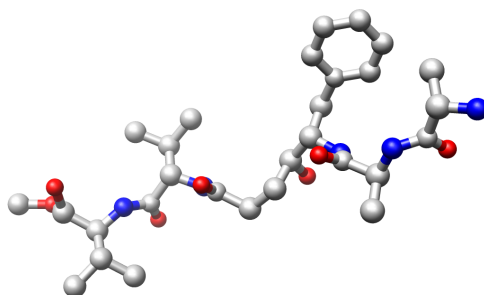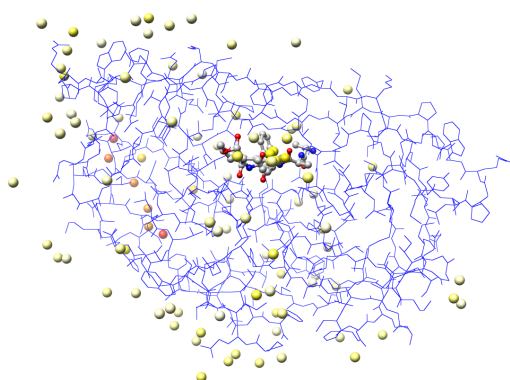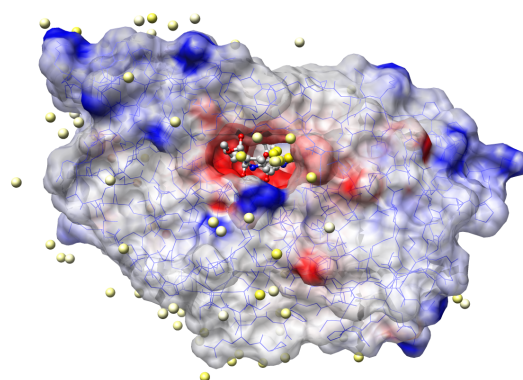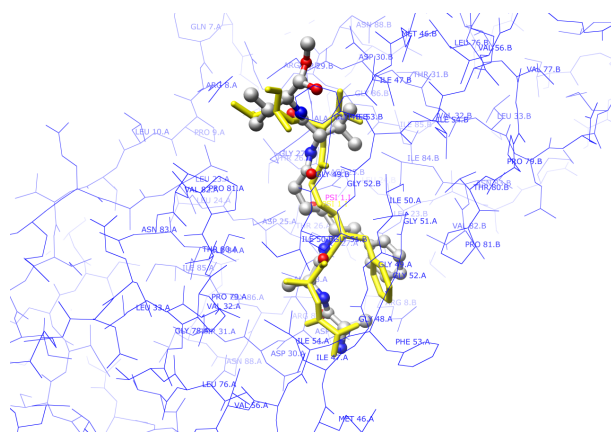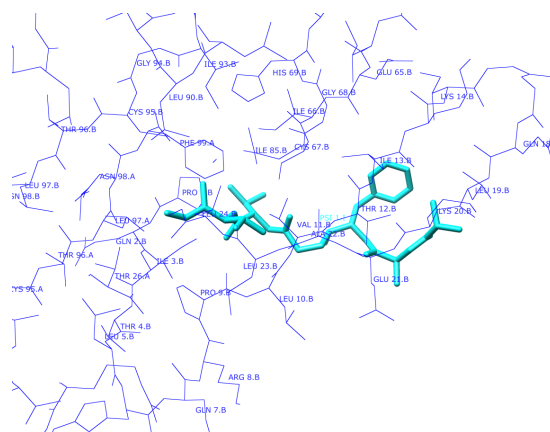



# 1ack

source: *Torpedo californica*

protein: Acetylcholinesterase

ligand: EDR inhibitor

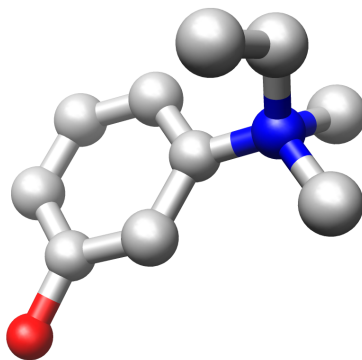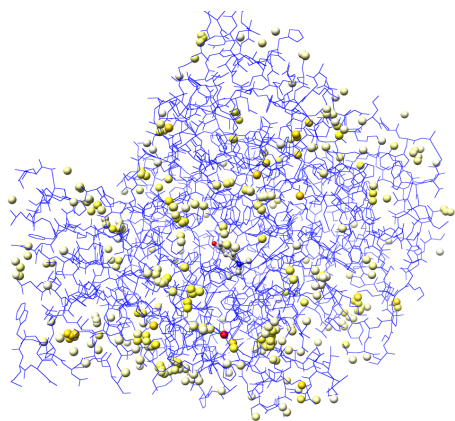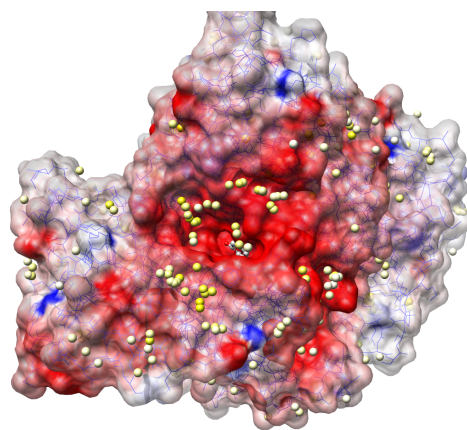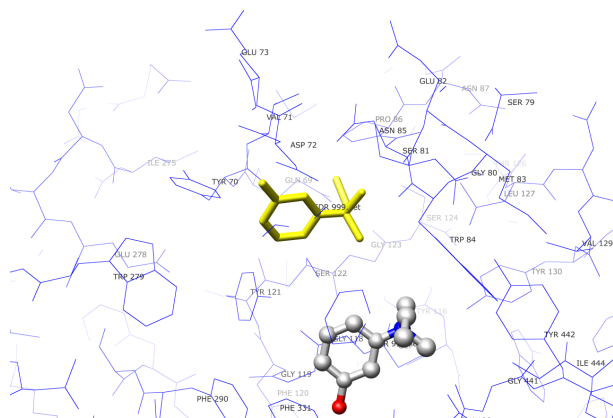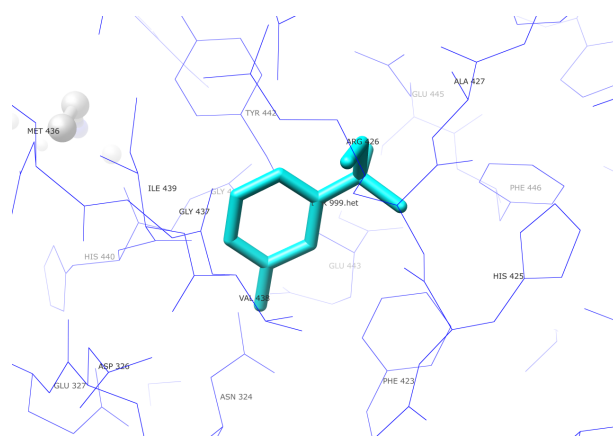

# 1azm

source: *Homo sapiens*

protein: Carbonic anhydrase I

ligand: AZM inhibitor sulfonamide

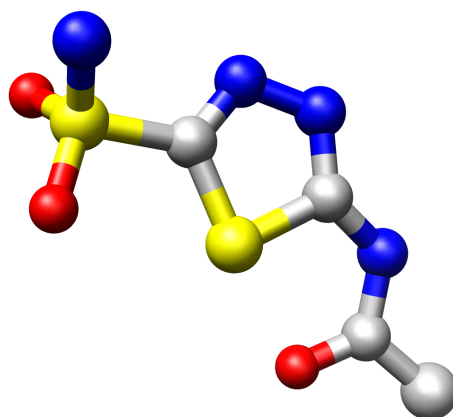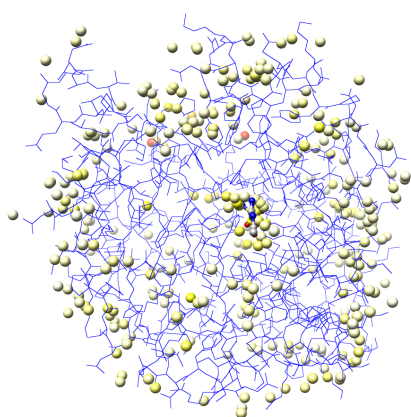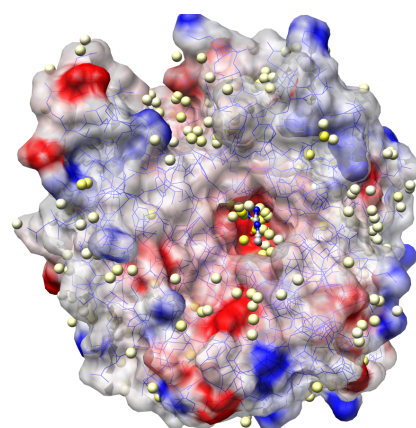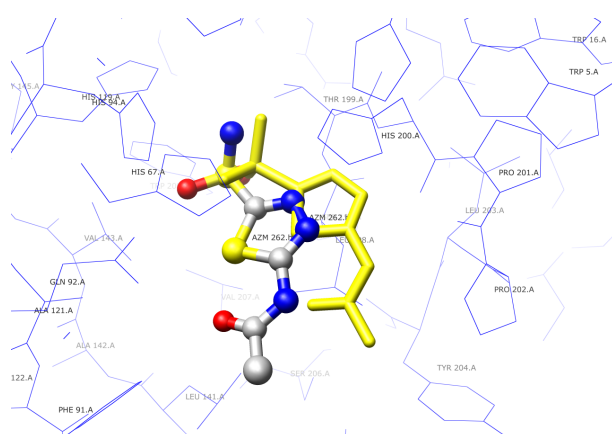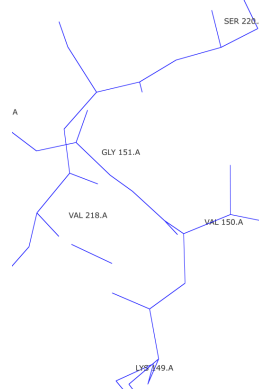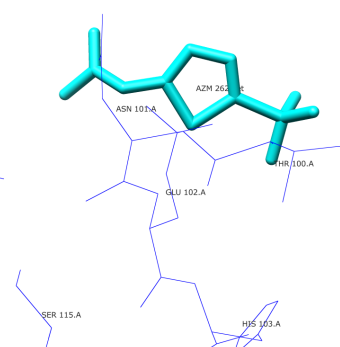

# 1baf

source: *Mus musculus*

protein: Monoclonal antibody AN2 Fab fragment

ligand: NPP hapten

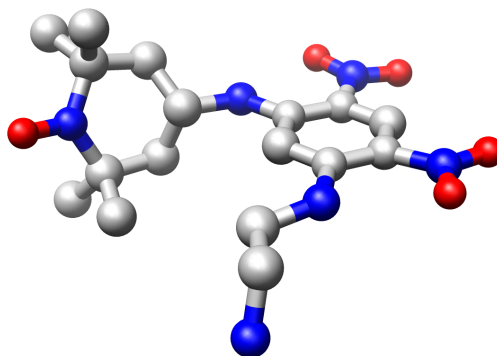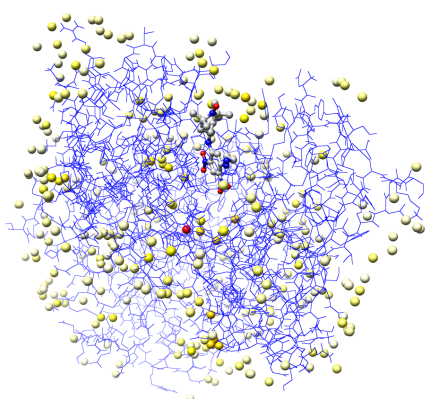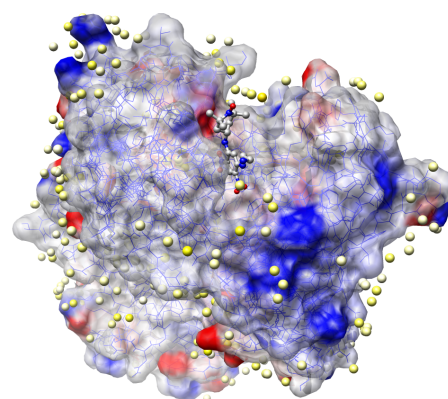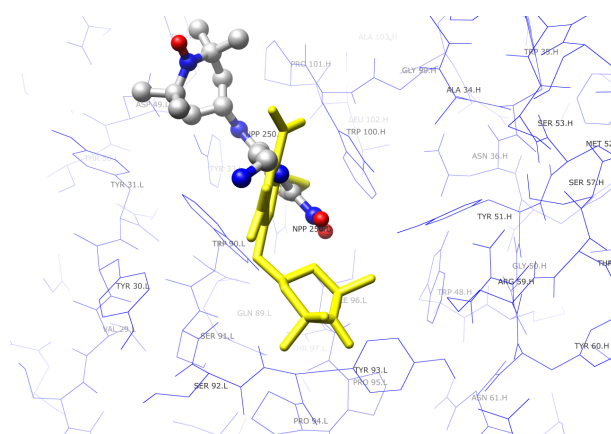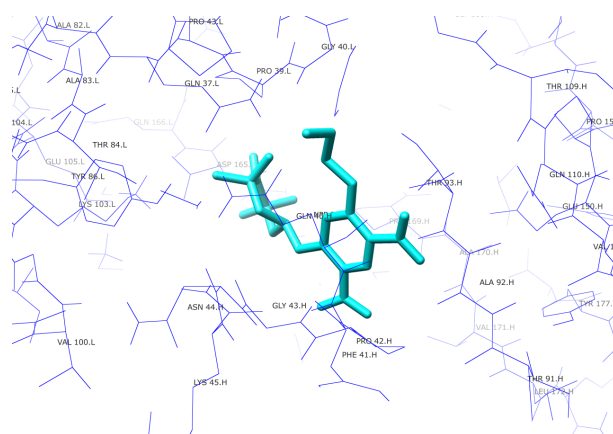











# 1cps

source: *Bos taurus*

protein: Carboxypeptidase A1 precursor

ligand: CPM inhibitor

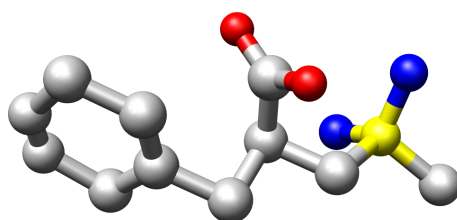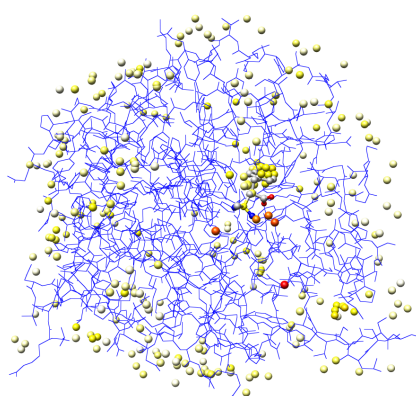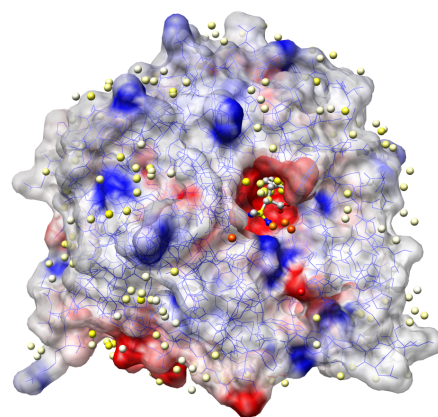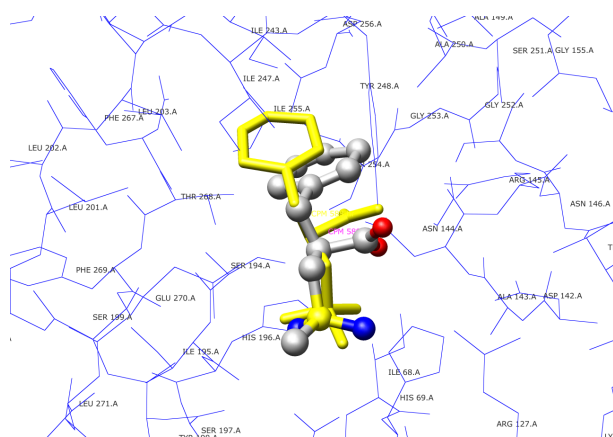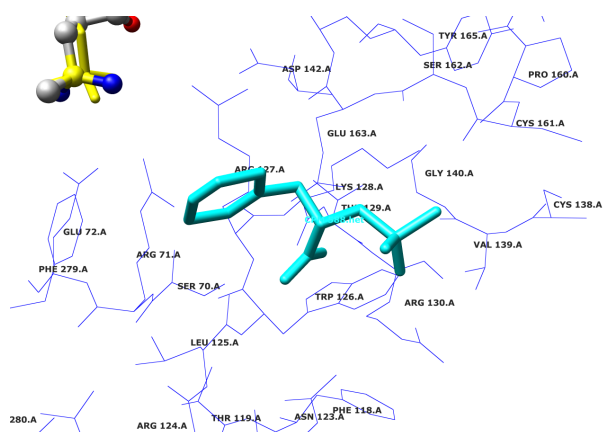





# 1dr1

source: *Gallus gallus*

protein: Dihydrofolate reductase

ligand: HBI biopterin

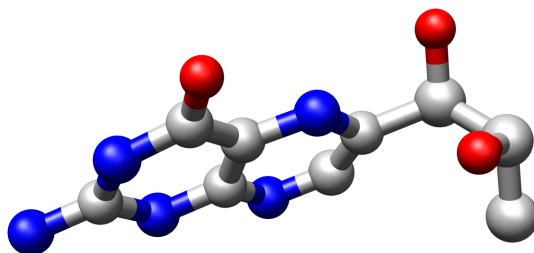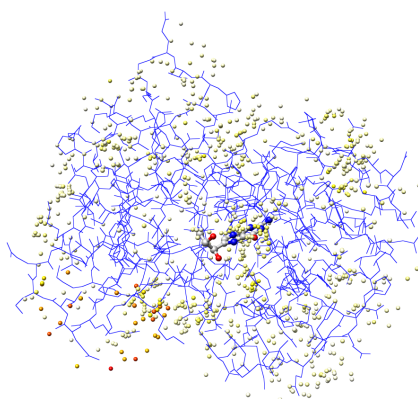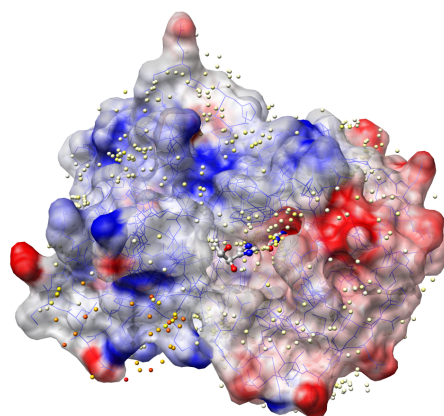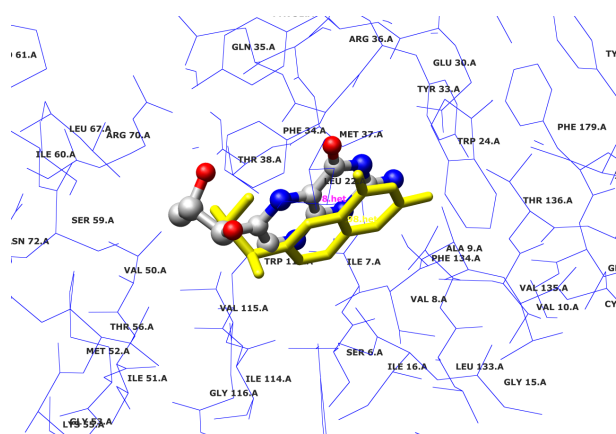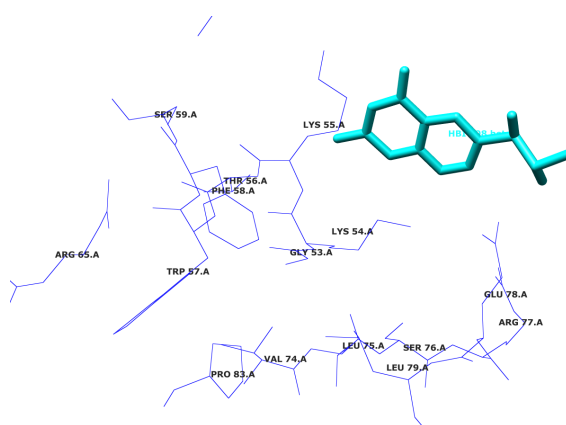



# 1eap

source: *Mus musculus*

protein: Immunoglobulin 17E8 Fab fragment

ligand: HEP hapten

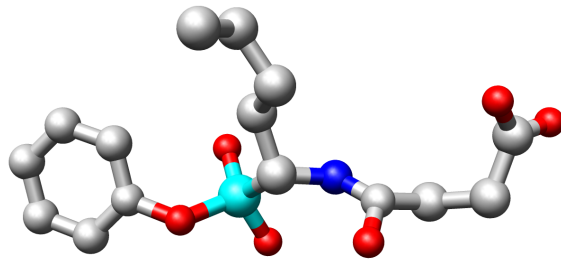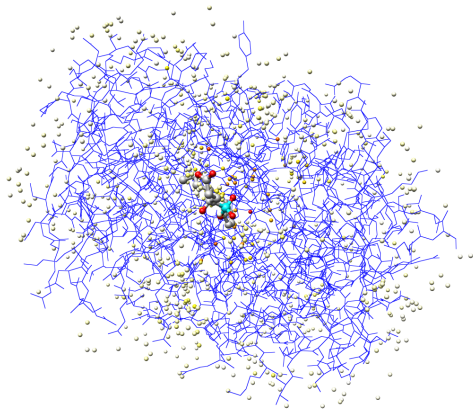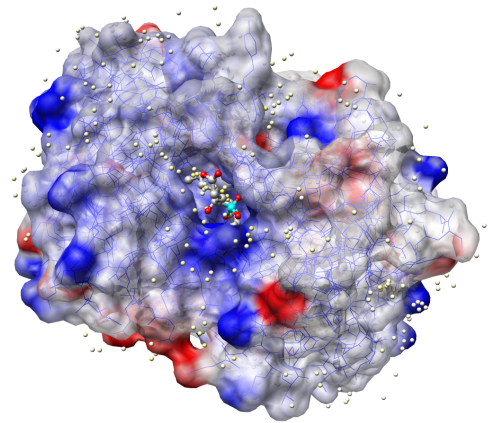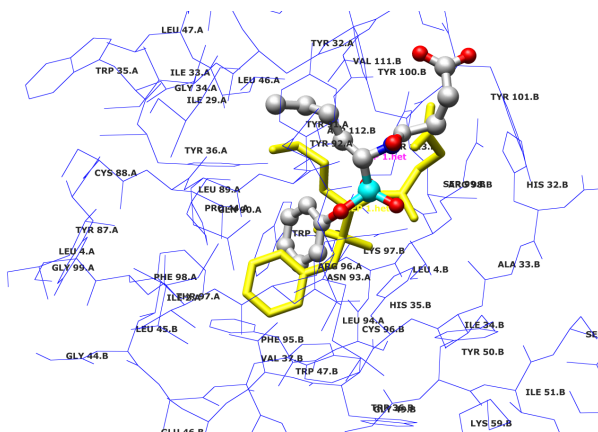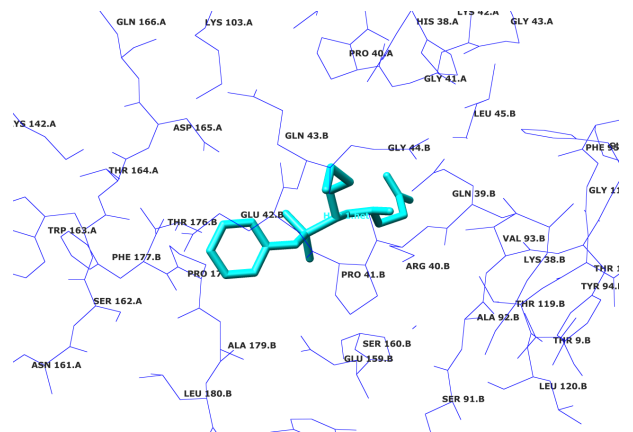

# 1eed

source: not given (fungus)

protein: Endothiapepsin

ligand: BOC-FOG-CHS-LEU inhibitor

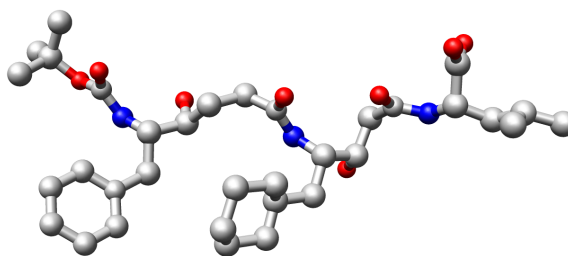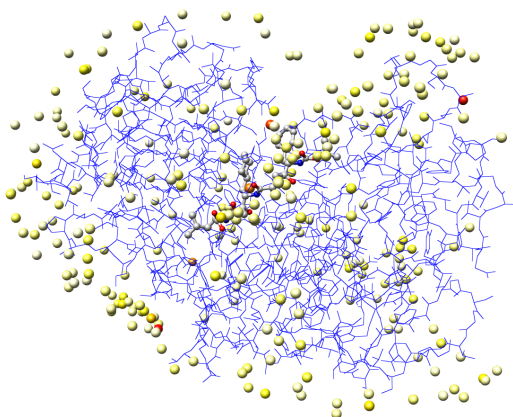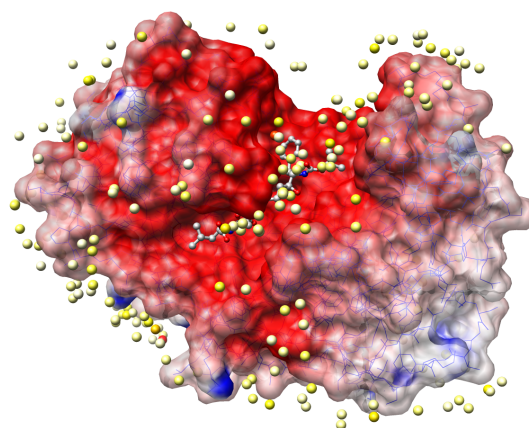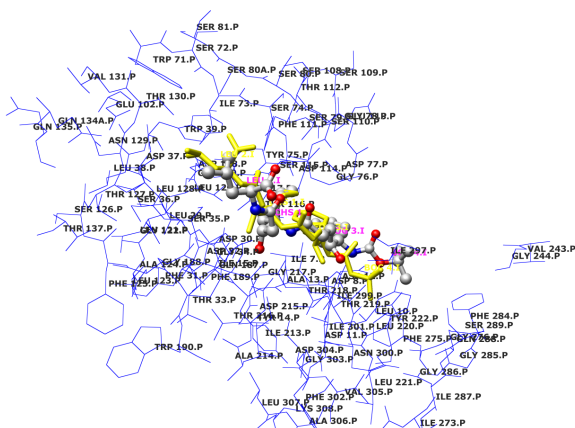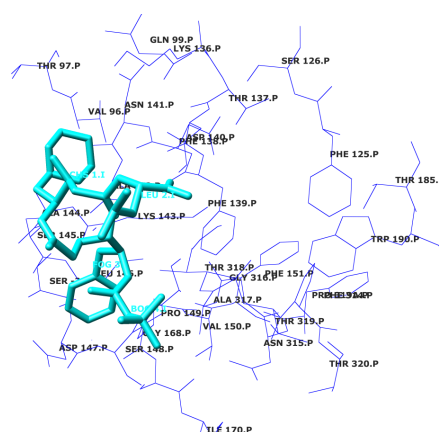





# 1fkg

source: *Homo sapiens*

protein: FKBP12

ligand: SB3 inhibitor

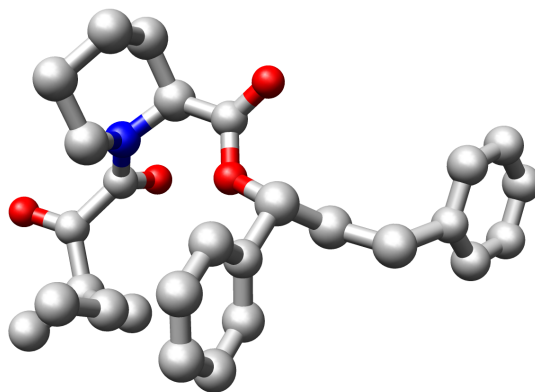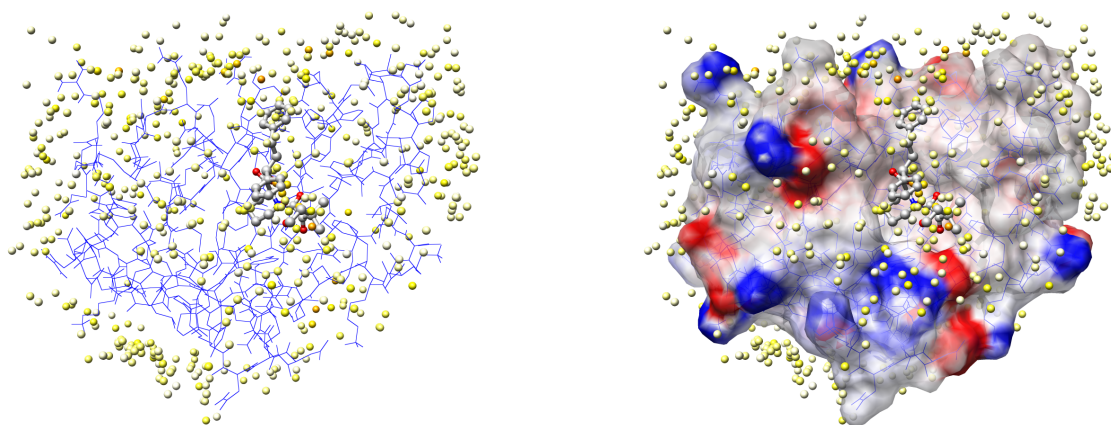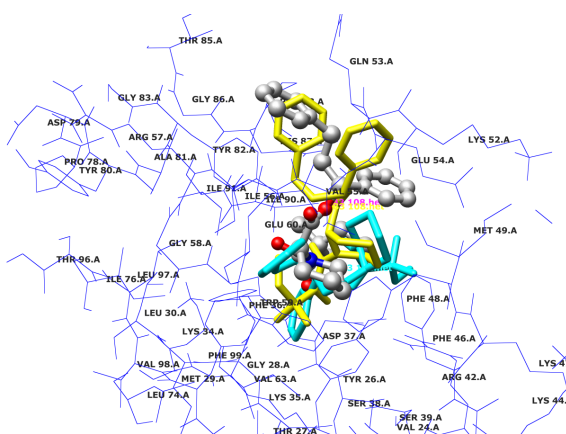

# 1fki

source: *Homo sapiens*

protein: FKBP12

ligand: SB1 inhibitor

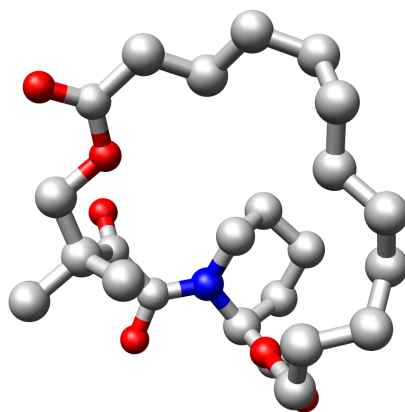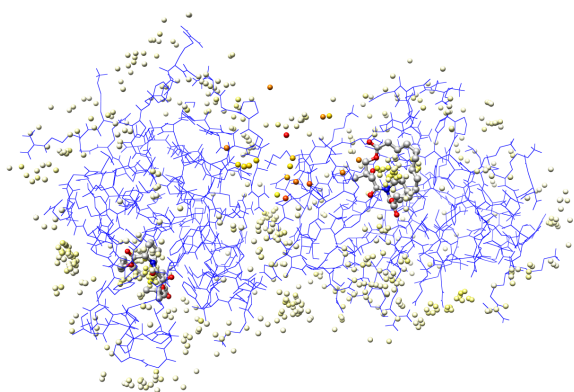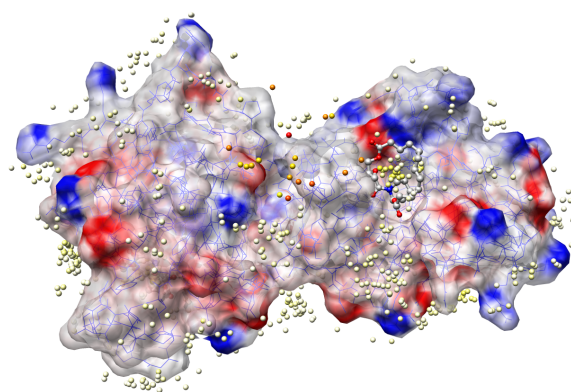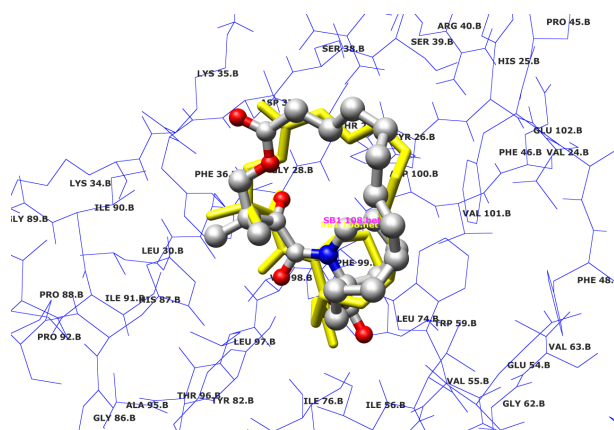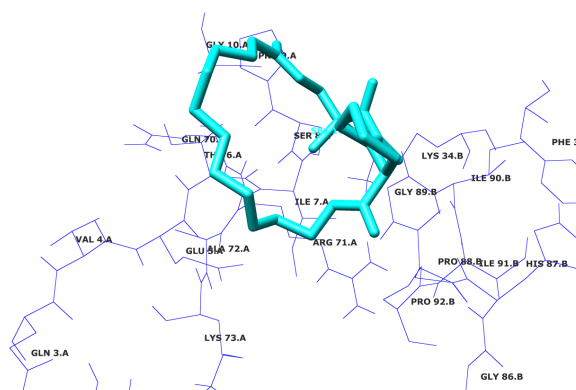



# 1glq

source: *Mus musculus*

protein: Glutathione S-transferaze

ligand: GTB inhibitor

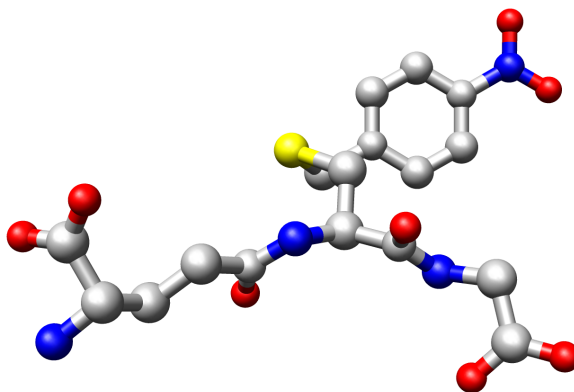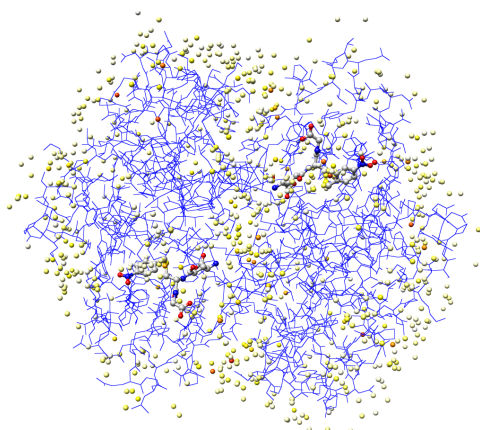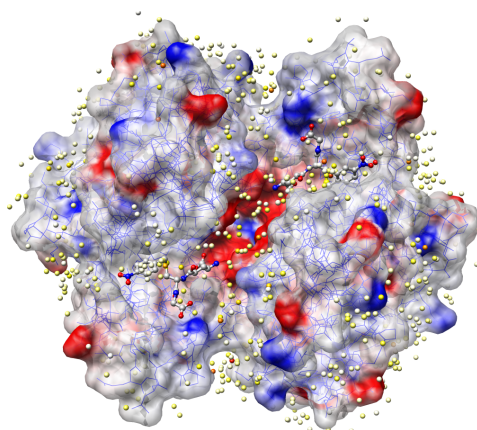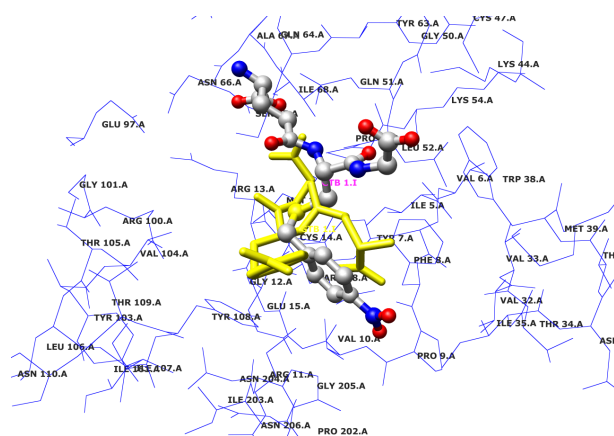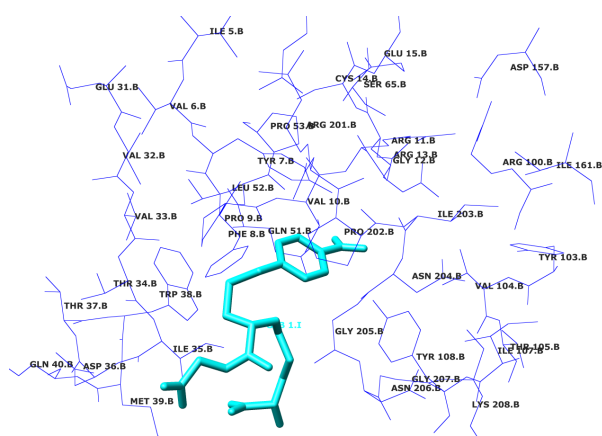

# 1hfc

source: *Homo sapiens*

protein: Fibroblast collagenase

ligand: PLH inhibitor

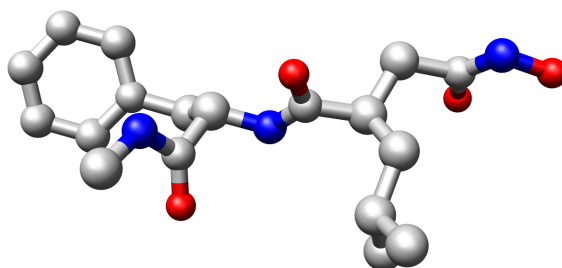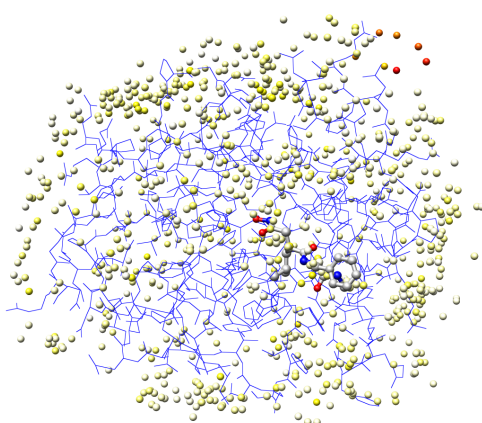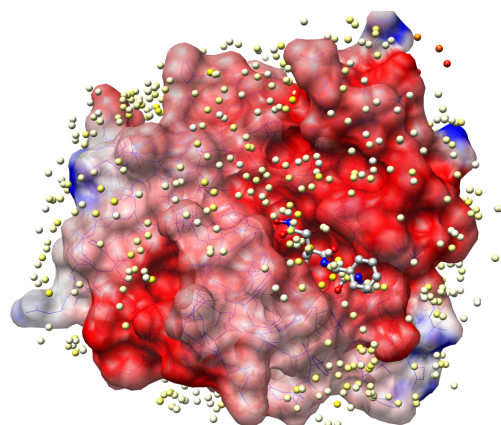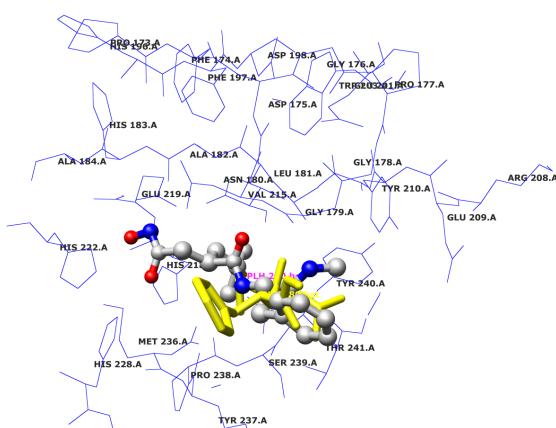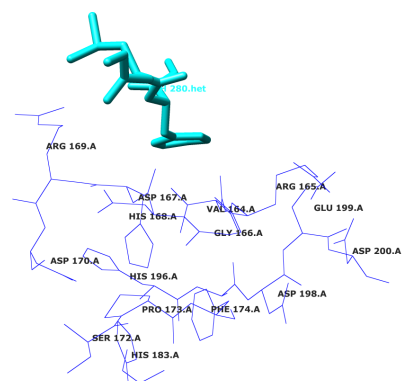

# 1hsl

source: *Escherichia coli*

protein: Histidine-binding protein

ligand: HIS histidine

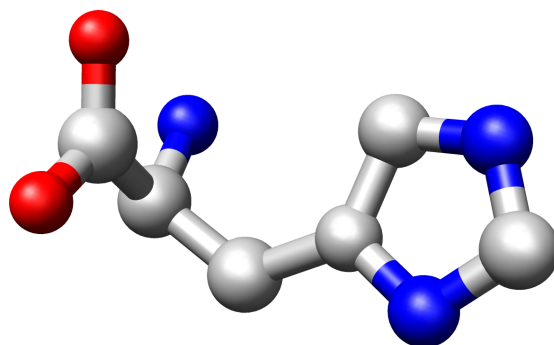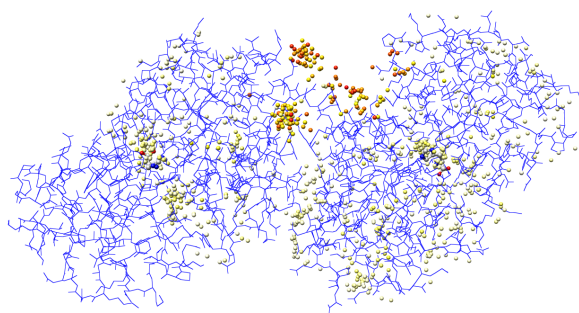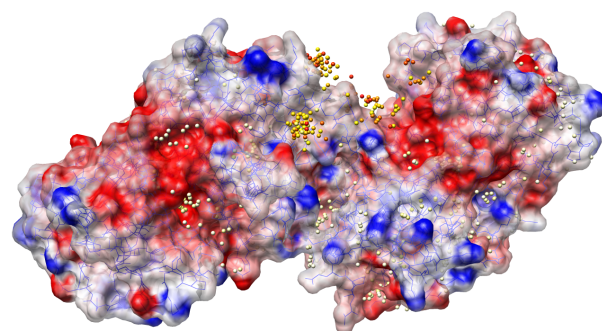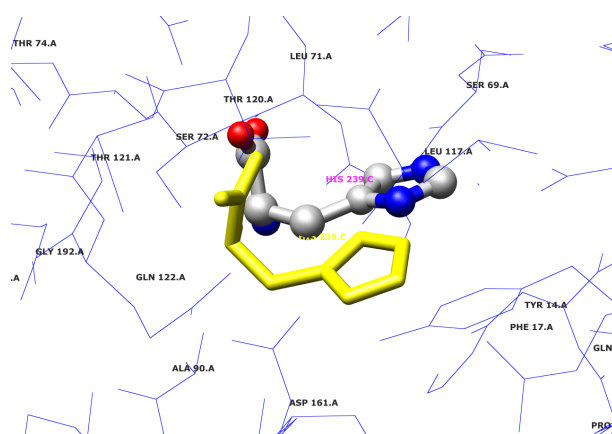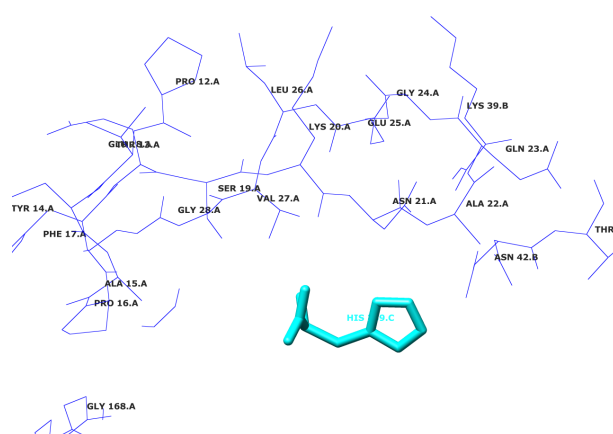





# 1icn

source: *Rattus norvegicus*

protein: FABP

ligand: OLA oleic acid

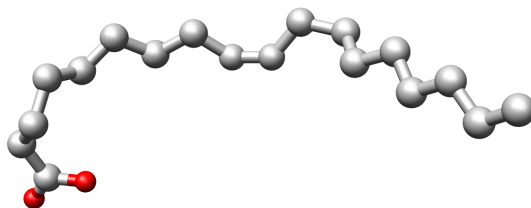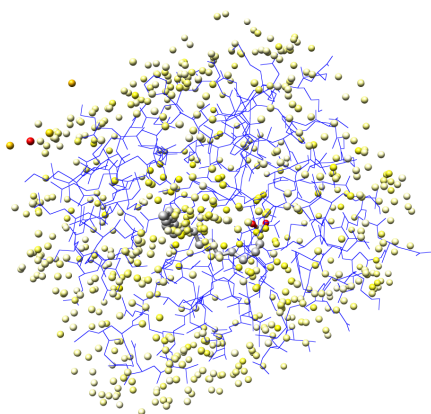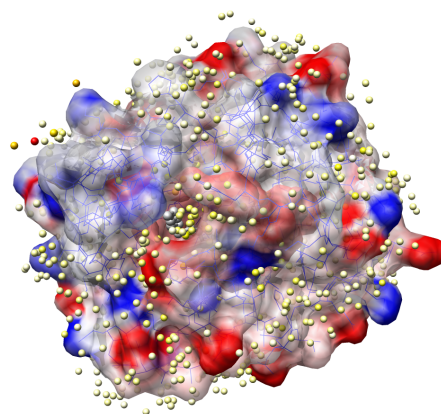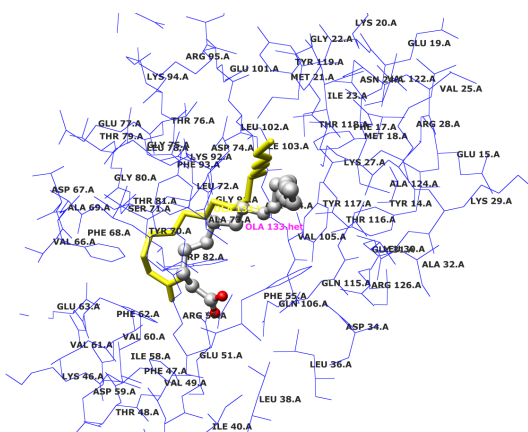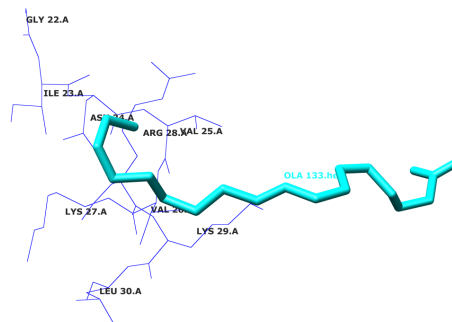

# 1imb

source: *Homo sapiens*

protein: Inositol monophosphatase

ligand: LIP substrate

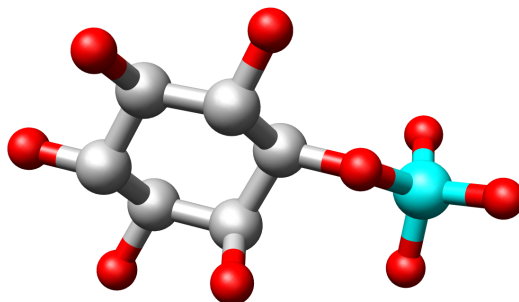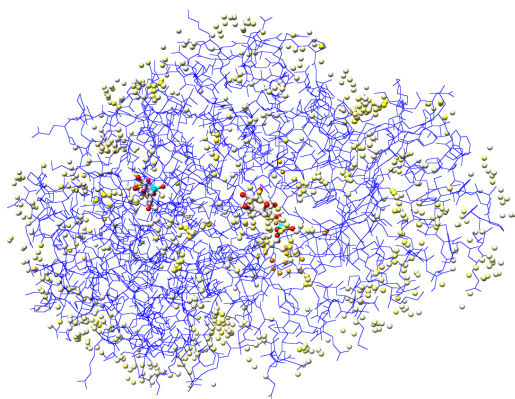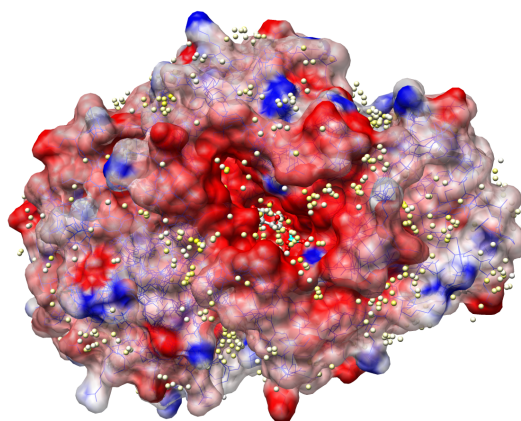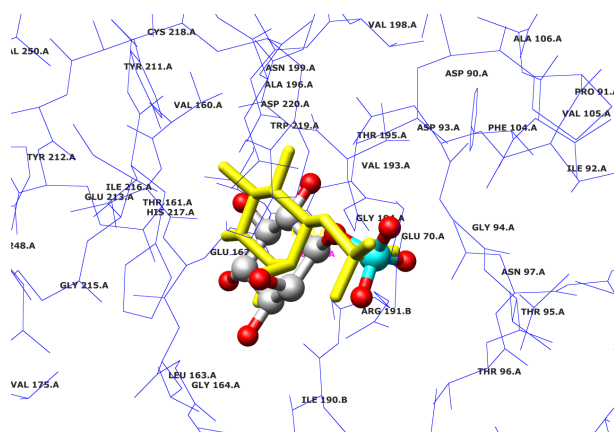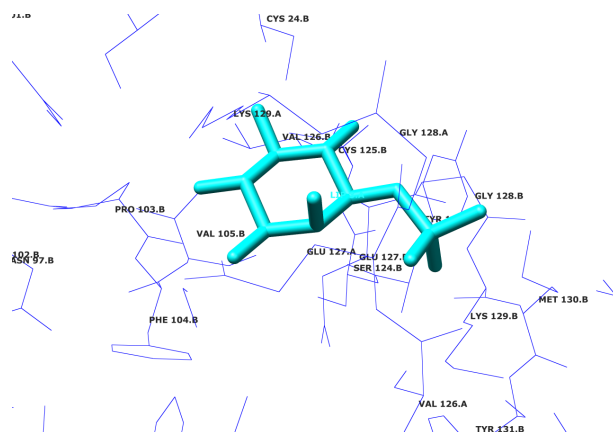



# 1ldm

source: *Squalus acanthius*

protein: Lactate dehydrogenase

ligand: OXM oxamic acid

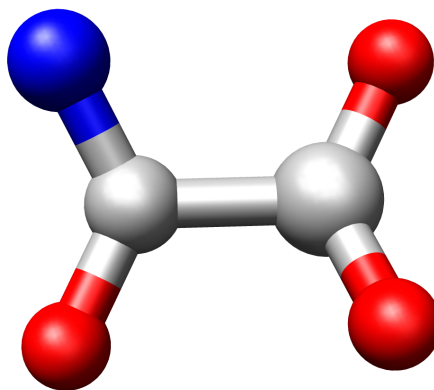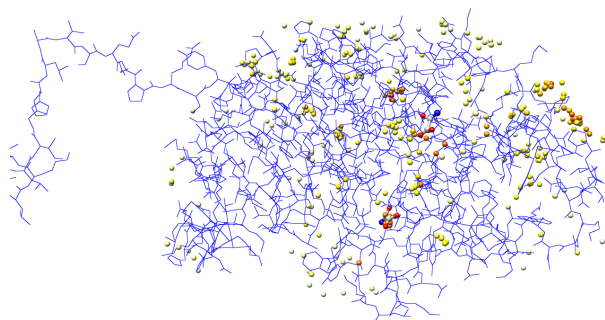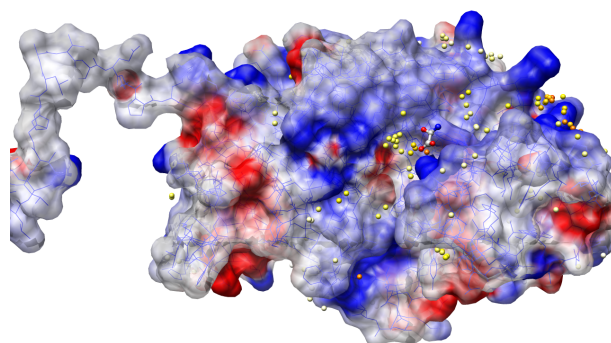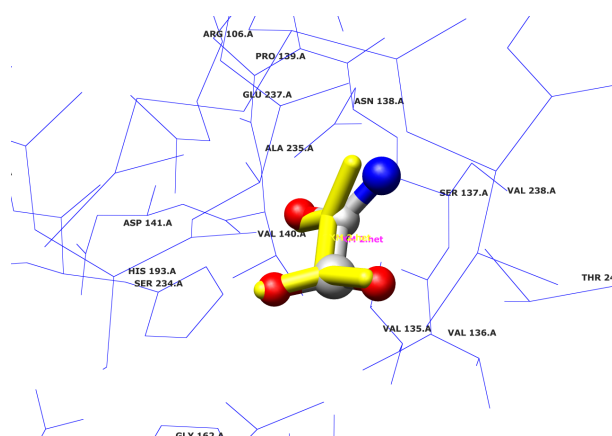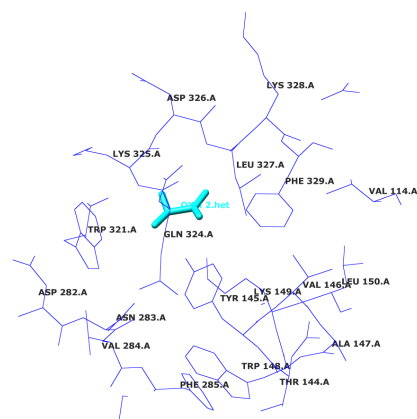







# 1mrg

source: *Momordica charantia*

protein: Ribosome-inactivating protein

ligand: ADN adenosine

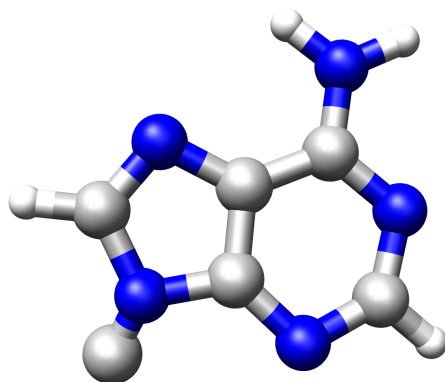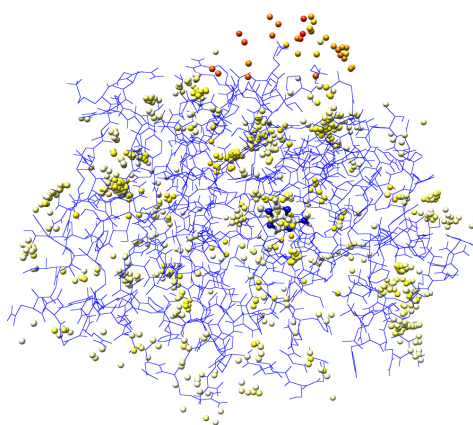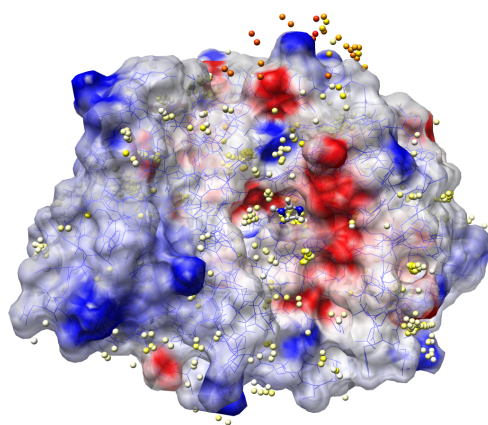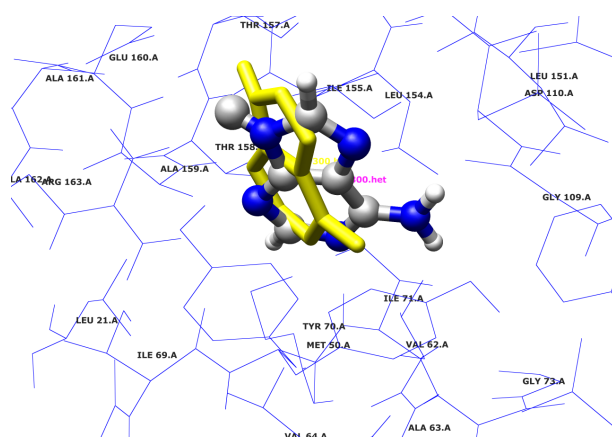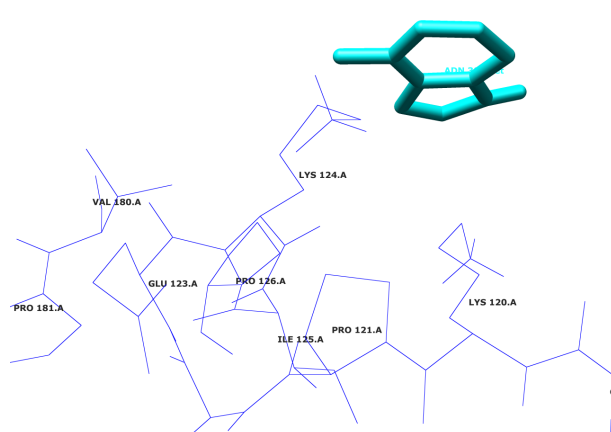



# 1mrk

source: *Momordica charantia*

protein: Ribosome-inactivating protein

ligand: FMC formycin

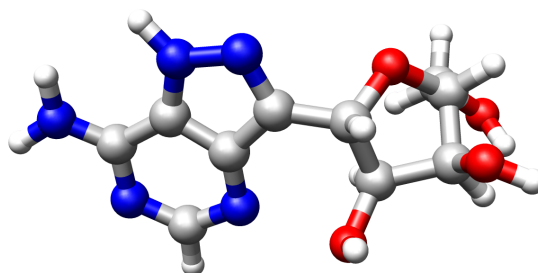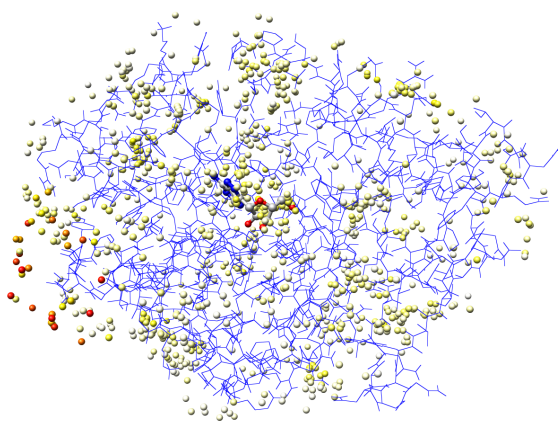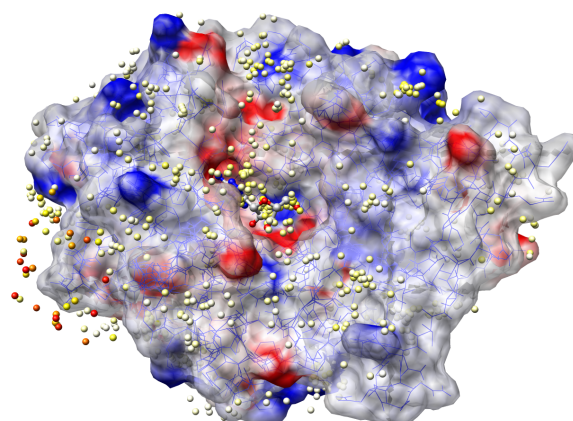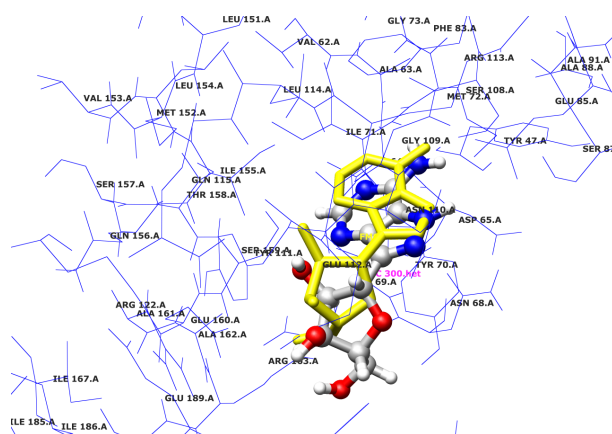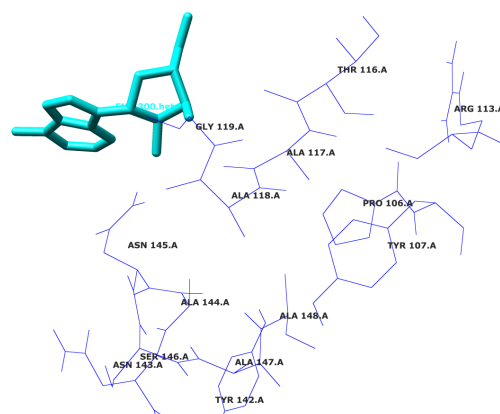

# 1mup

source: *Mus musculus*

protein: Pheromone-binding protein

ligand: TZL thiazole

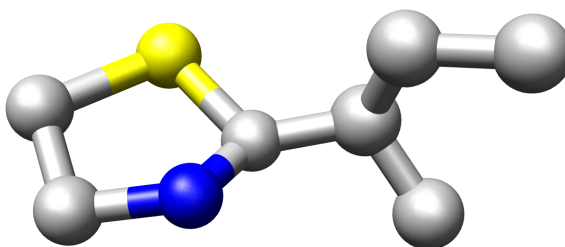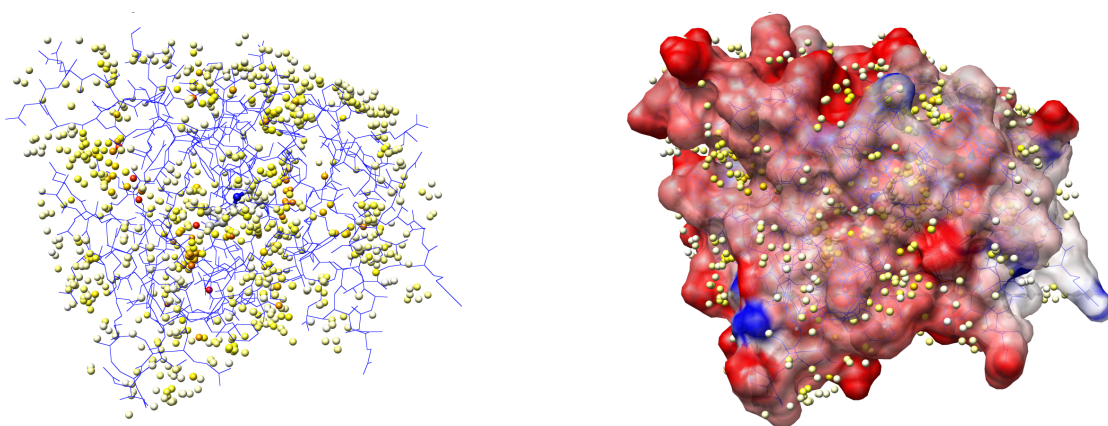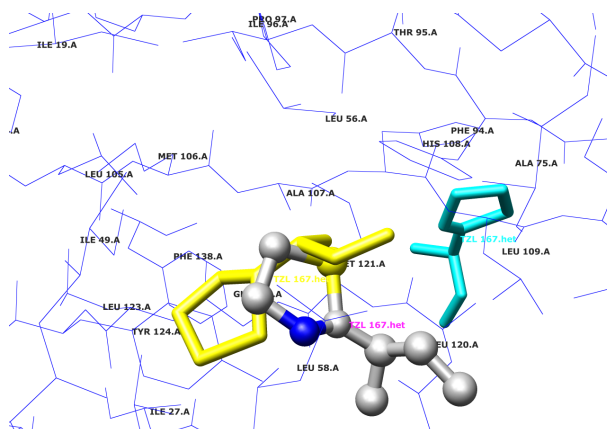

# 1pbd

source: *Pseudomonas fluorescens*

protein: Hydroxylase

ligand: PAB aminobenzoic acid

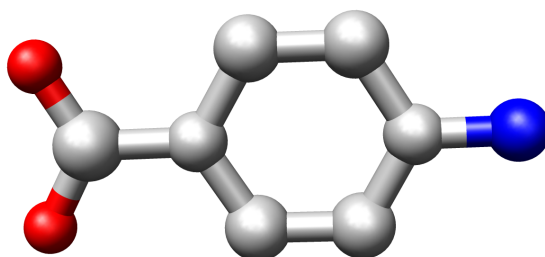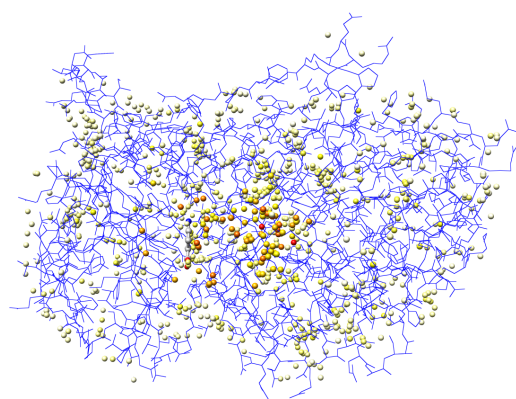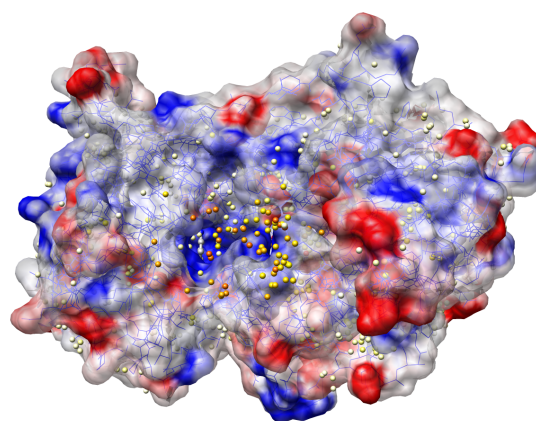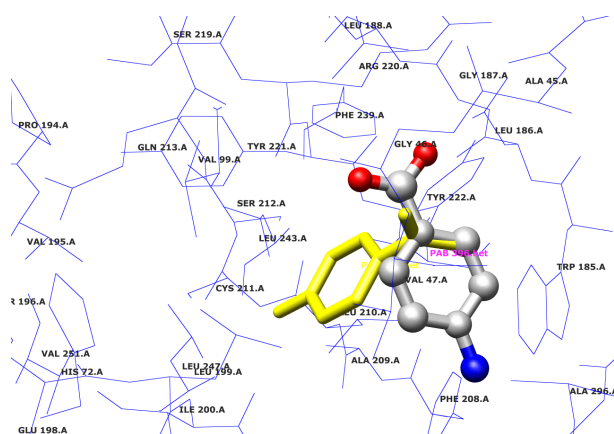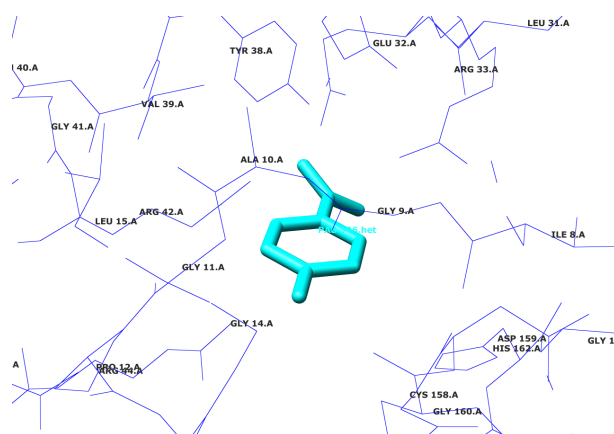

# 1poc

source: *Apis mellifera*

protein: Phospholipase A2

ligand: GEL transition-state analogue

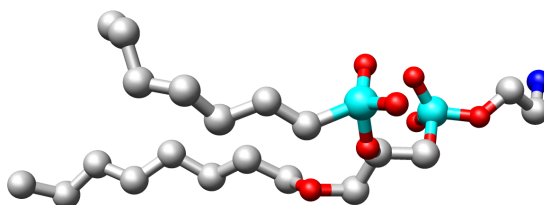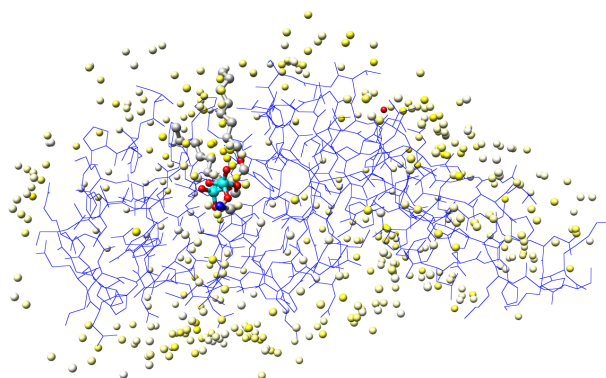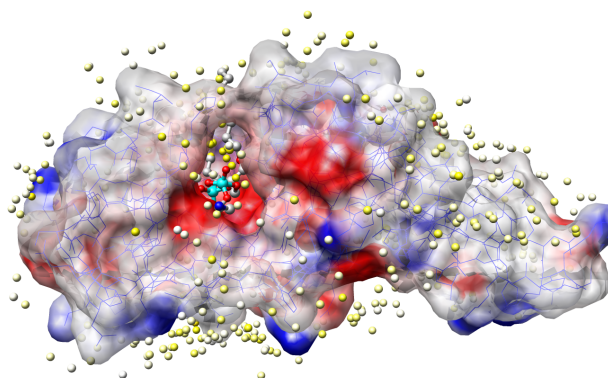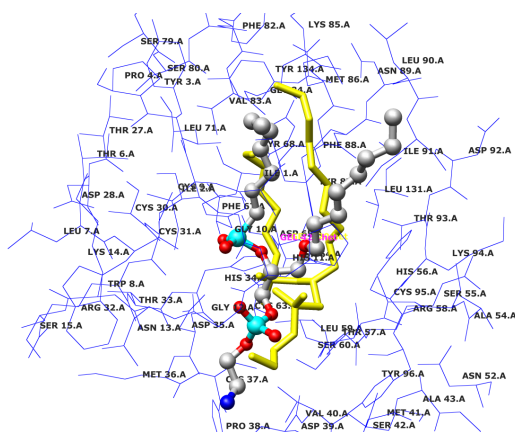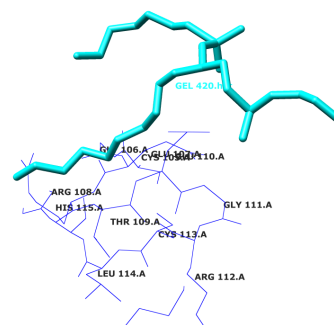

# 1snc

source: *Staphylococcus aureus*

protein: Thermonuclease precursor

ligand: THP inhibitor

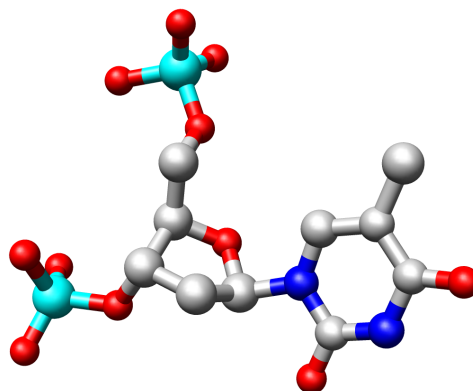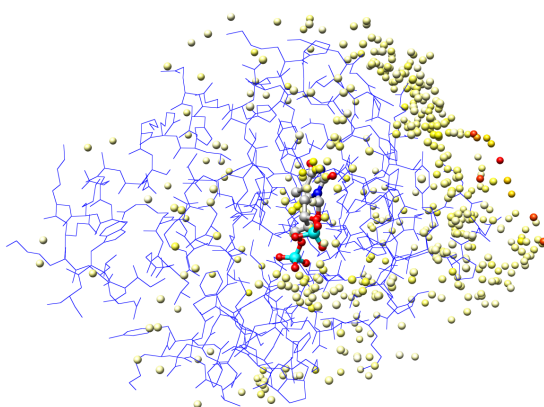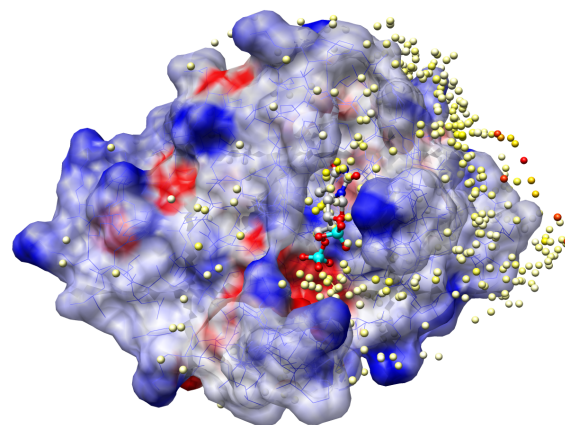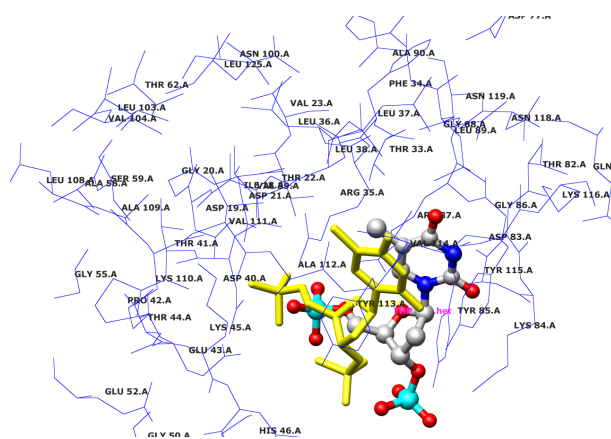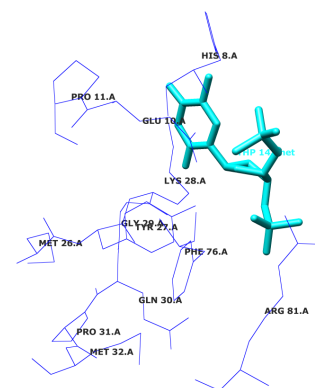

# 1srj

source: *Streptomyces avidinii*

protein: Streptavidin

ligand: NAB synthetic azobenzene

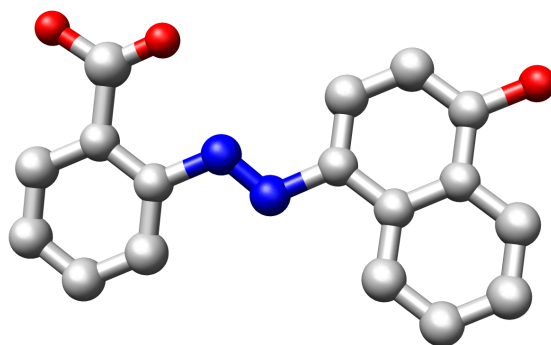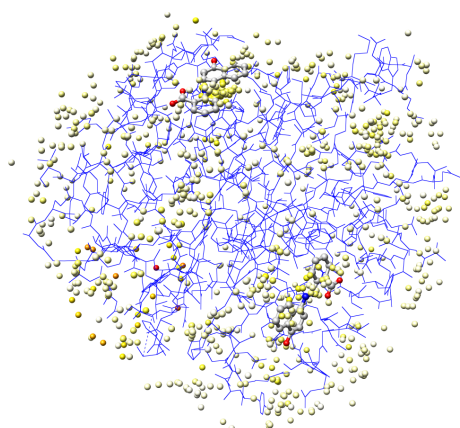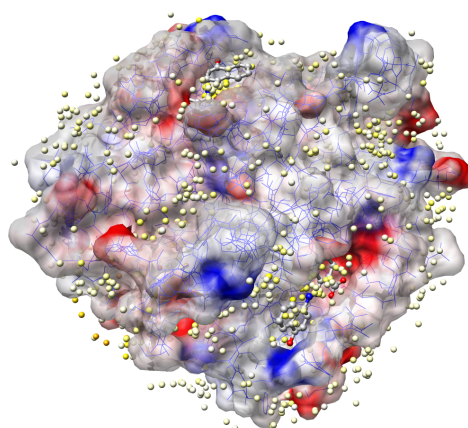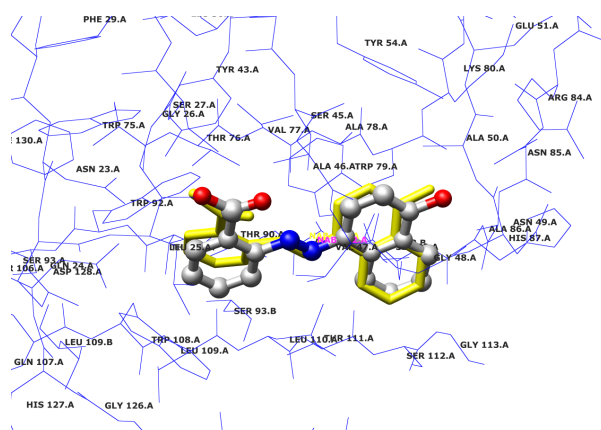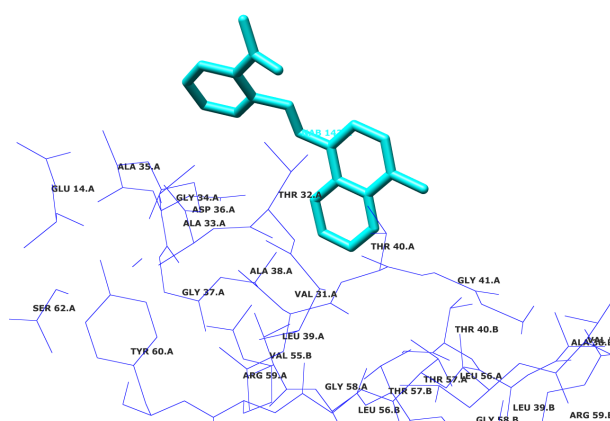



# 1tdb

source: *Lactobacillus casei*

protein: Thymidylate synthase

ligand: UFP substrate analogue

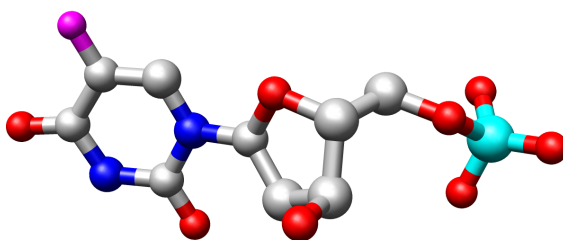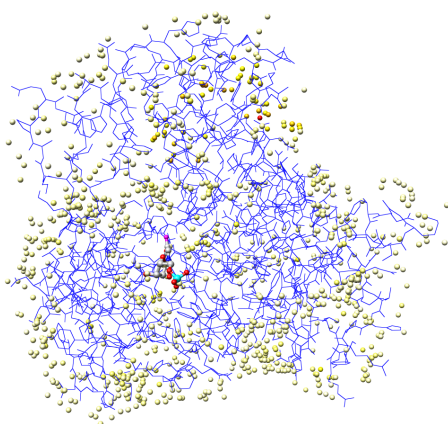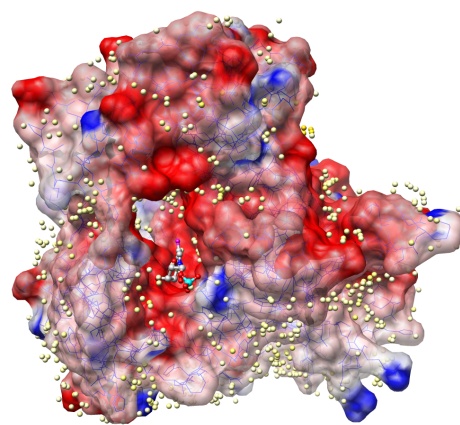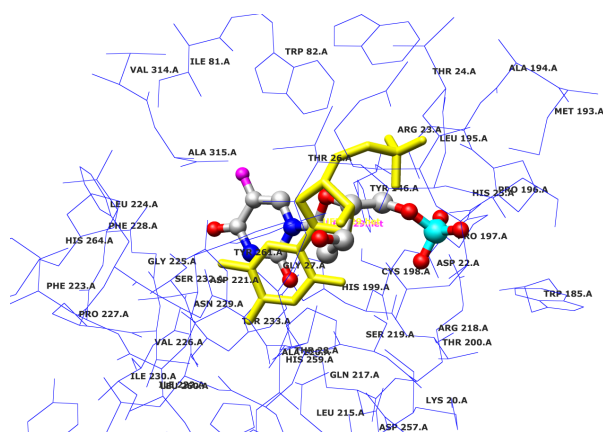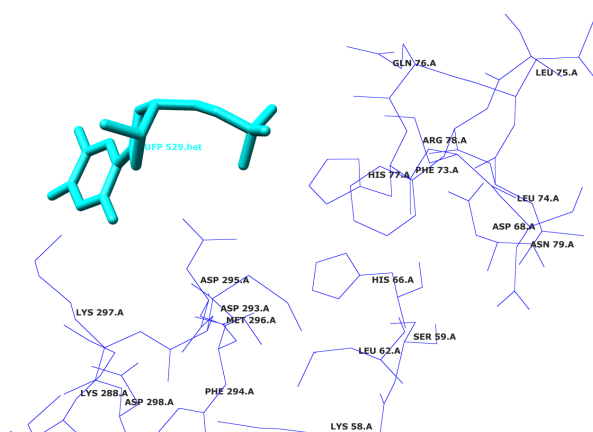



# 1tng

source: *Bos taurus*

protein: Trypsin

ligand: AMC inhibitor

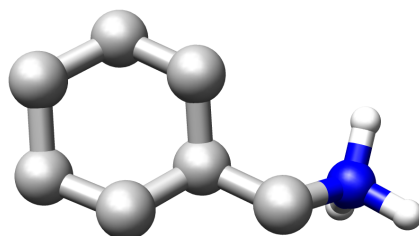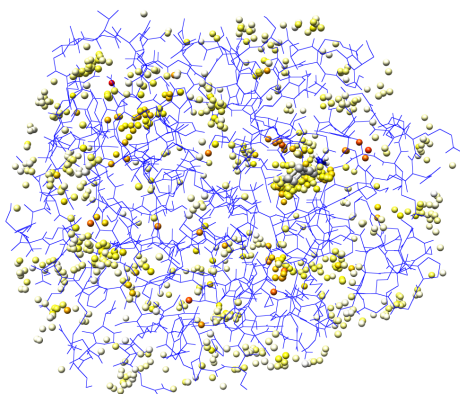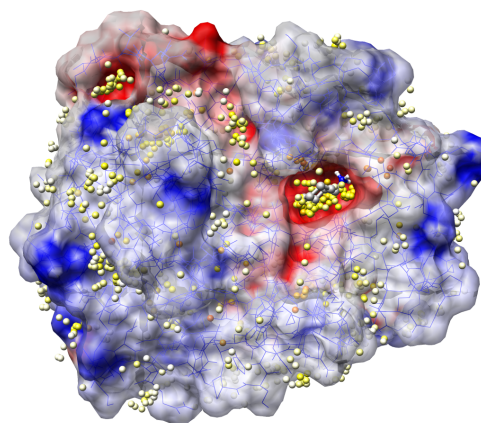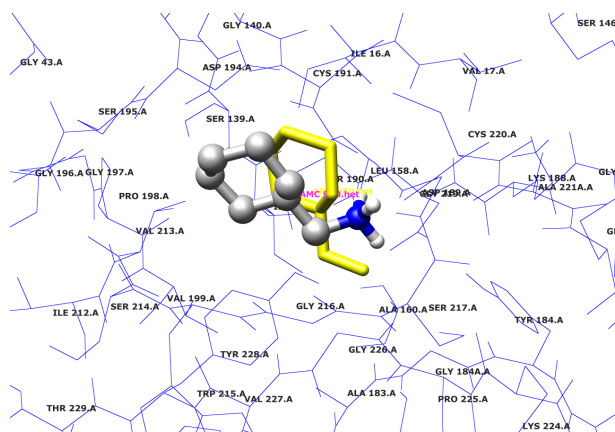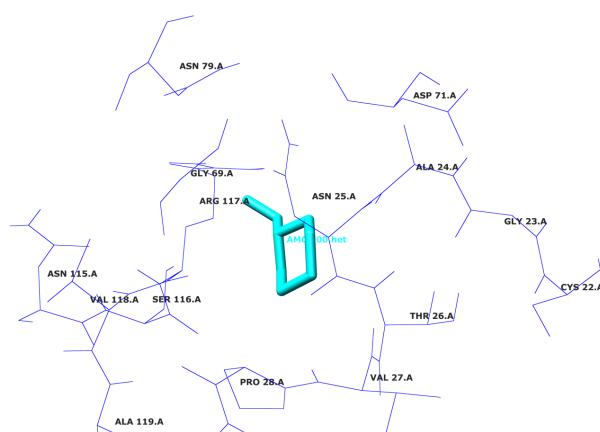

# 1tnl

source: *Bos taurus*

protein: Trypsin

ligand: TPA inhibitor

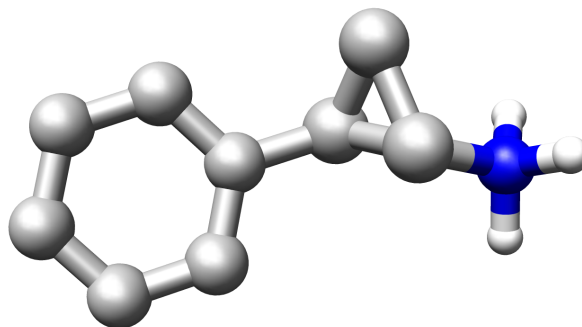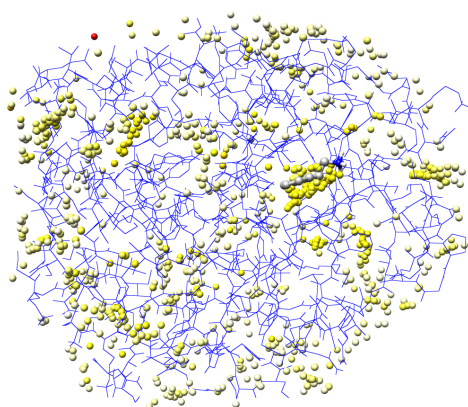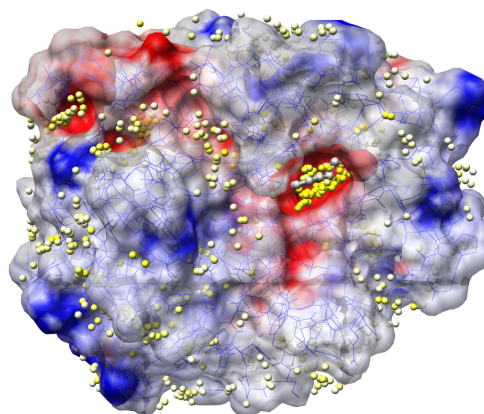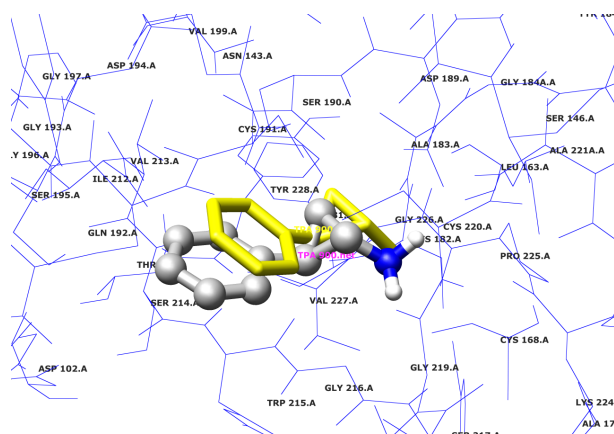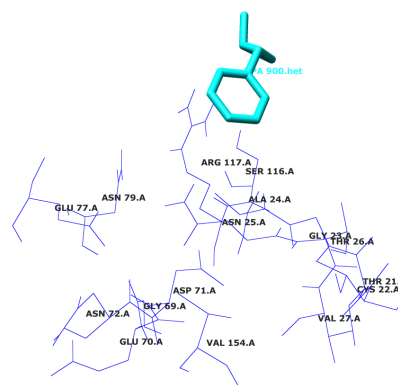

# 1tph

source: *Gallus gallus*

protein: Triosephosphate isomerase

ligand: PGH inhibitor

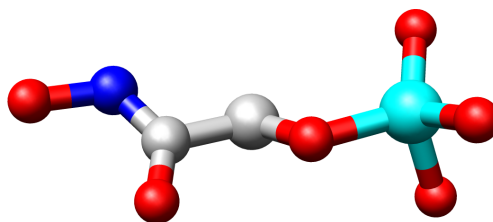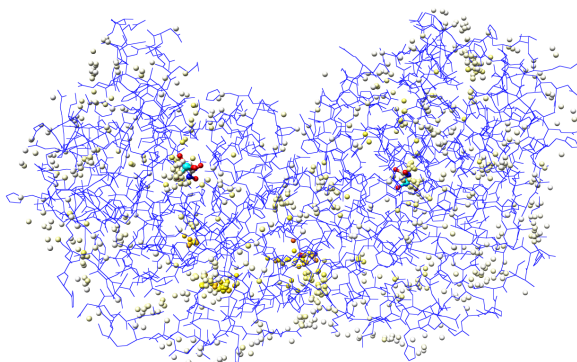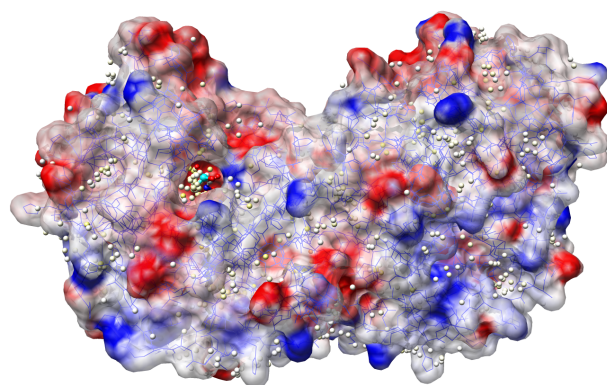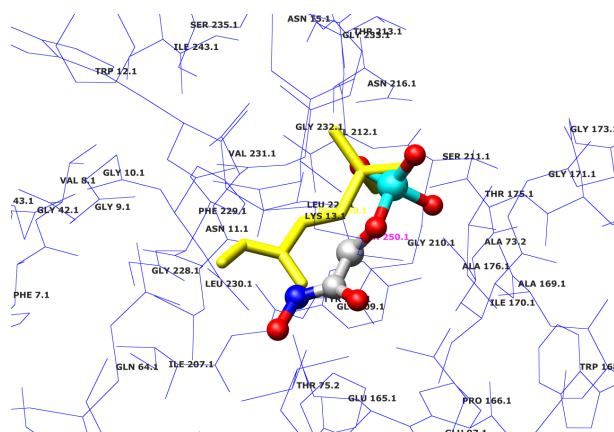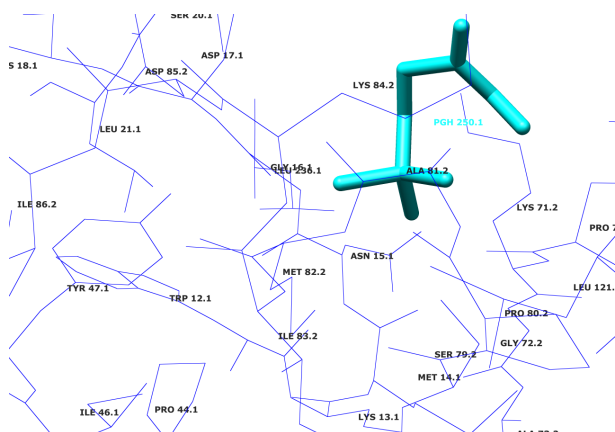

# 1tpp

source: *Bos taurus*

protein: Trypsin

ligand: APA inhibitor

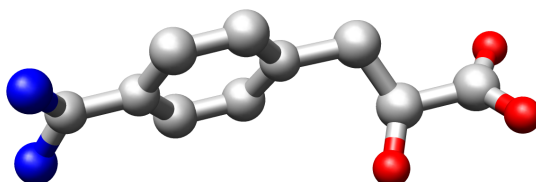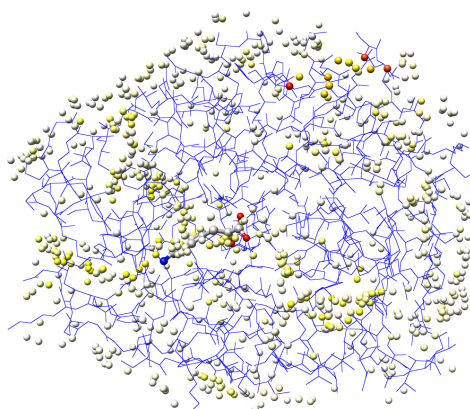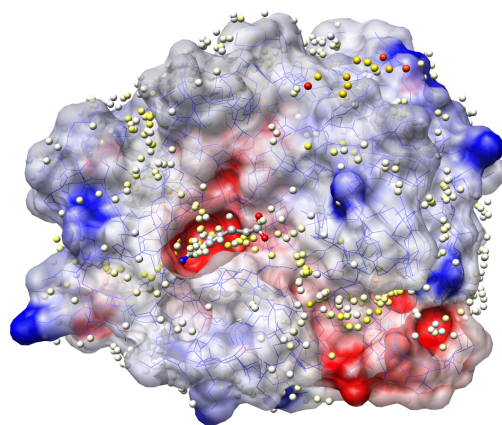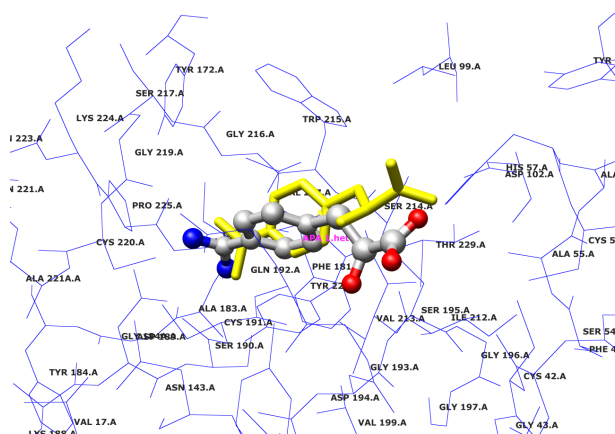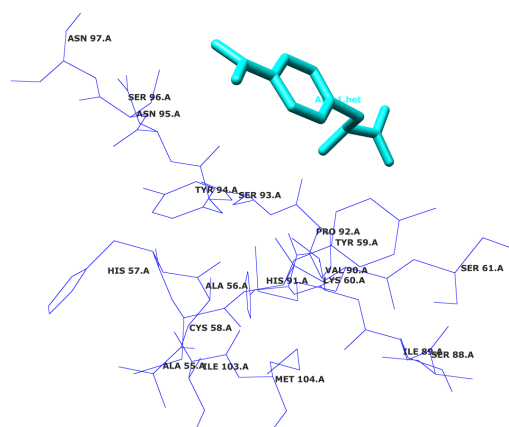

# 1ukz

source: *Saccharomyces cerevisiae*

protein: Uridylate kinase

ligand: ADP

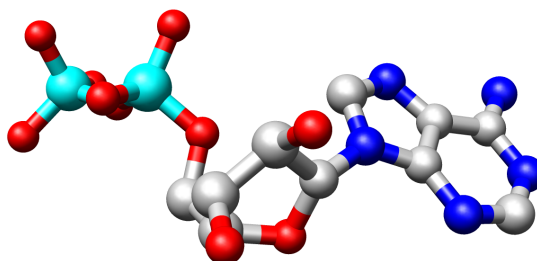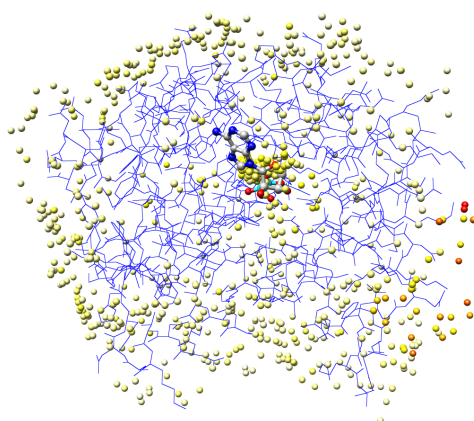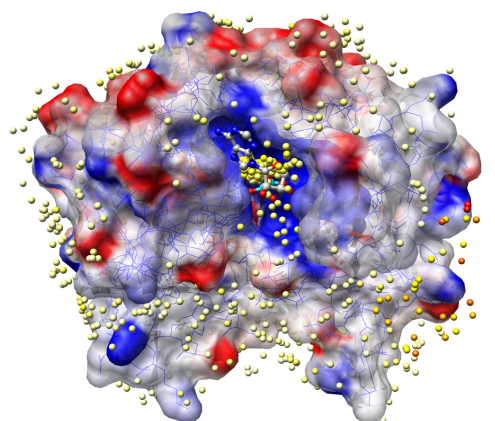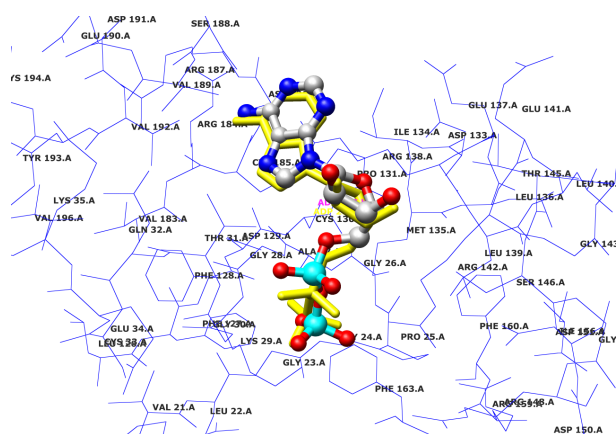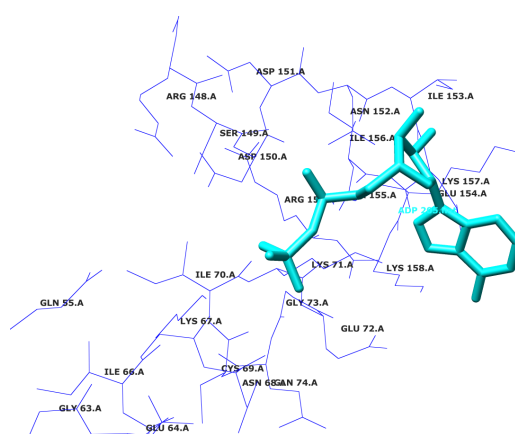

# 1ulb

source: *Homo sapiens*

protein: Purine nucleoside phosphorylase

ligand: GUN guanine

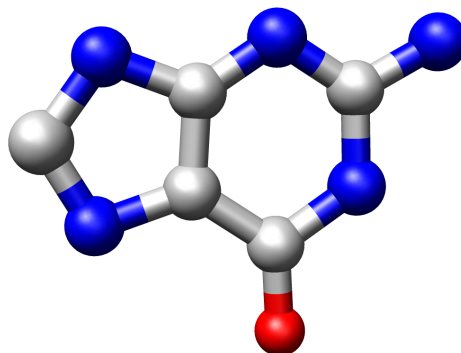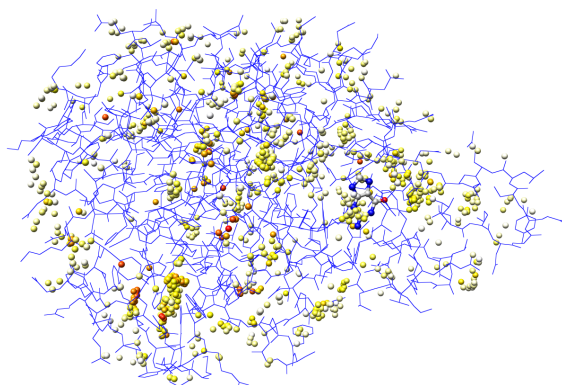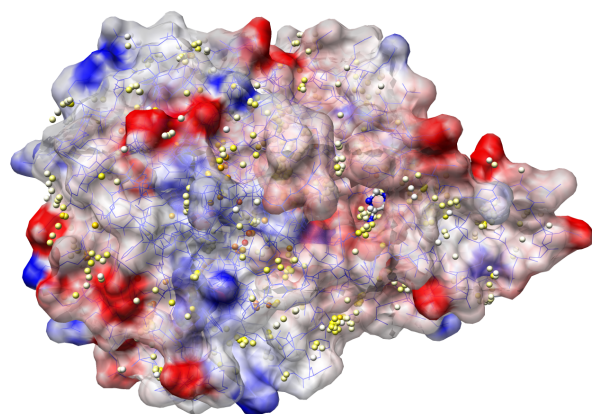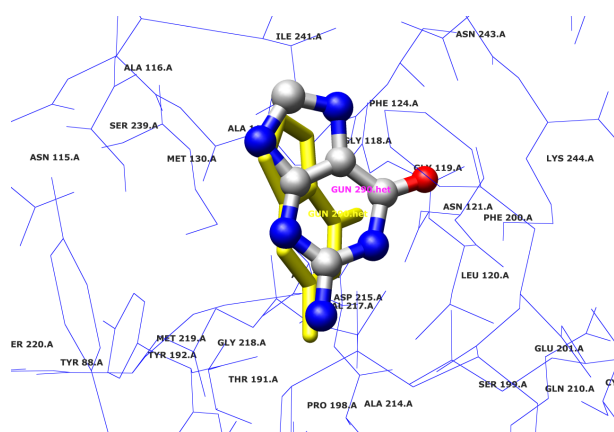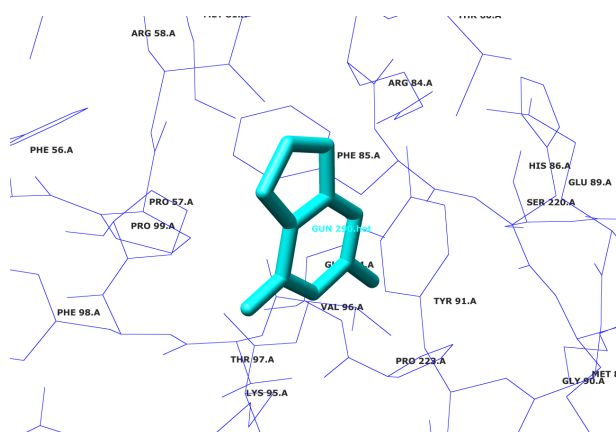

# 1xid

source: *Streptomyces rubiginosus*

protein: D-xylose isomerase

ligand: ACS product analogue

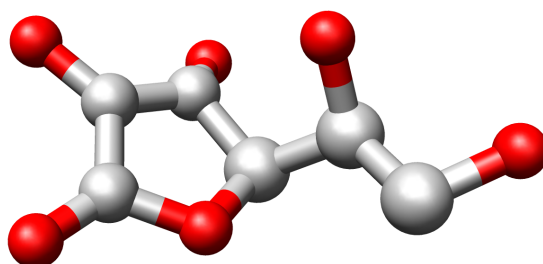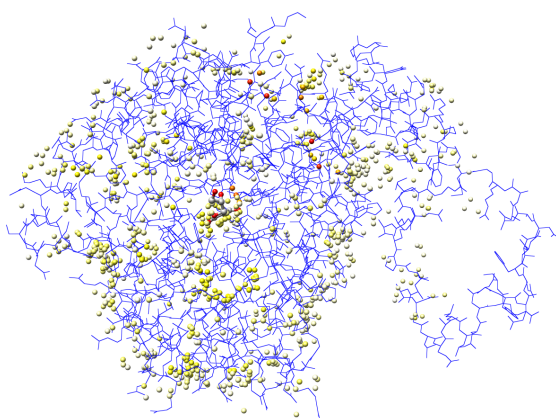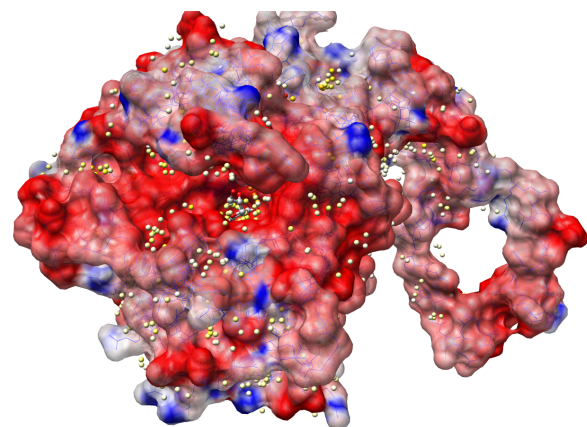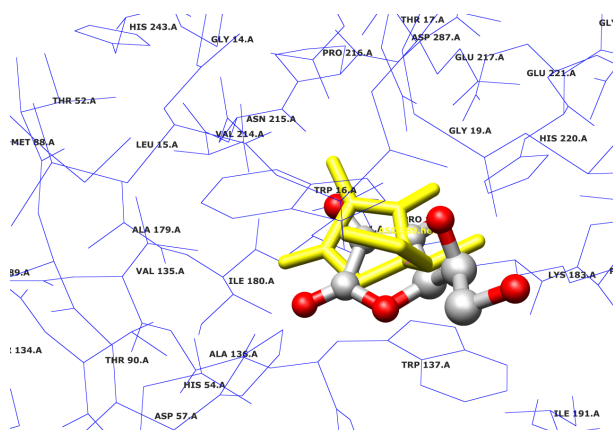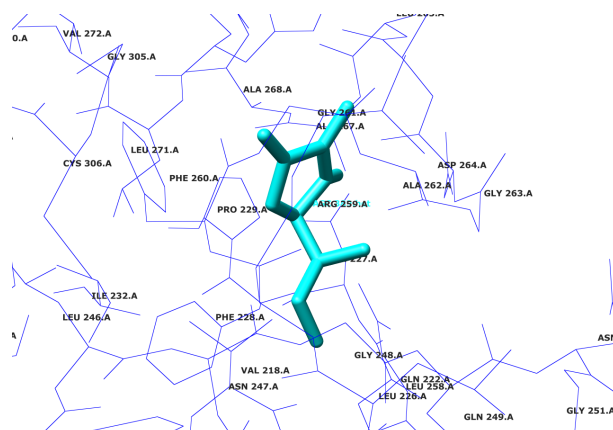

# 1xie

source: *Streptomyces rubiginosus*

protein: D-xylose isomerase

ligand: ASO substrate analogue

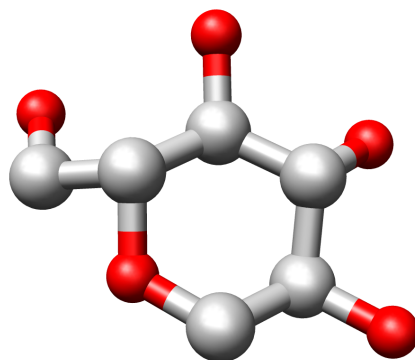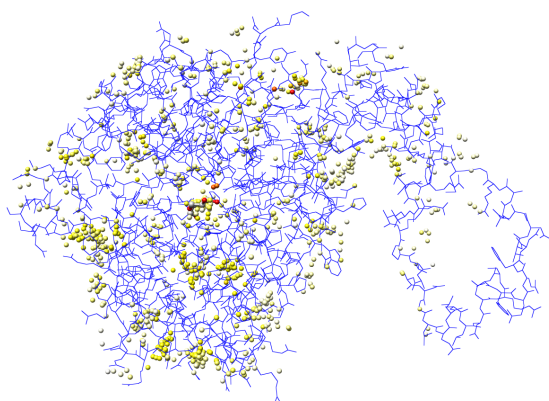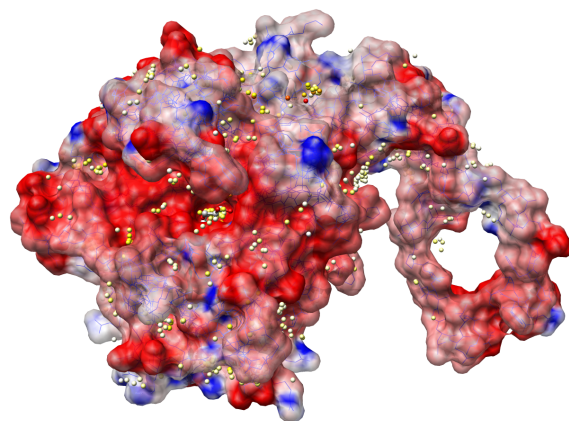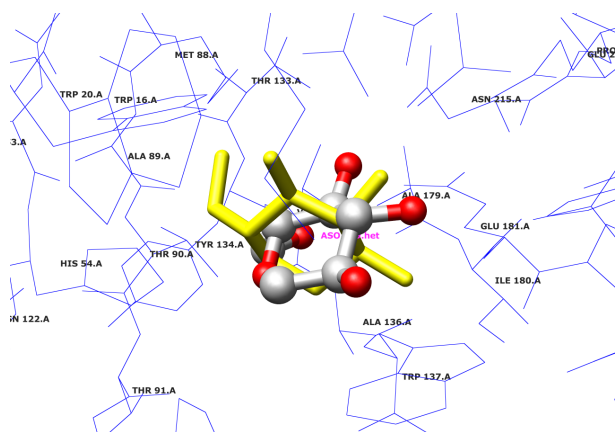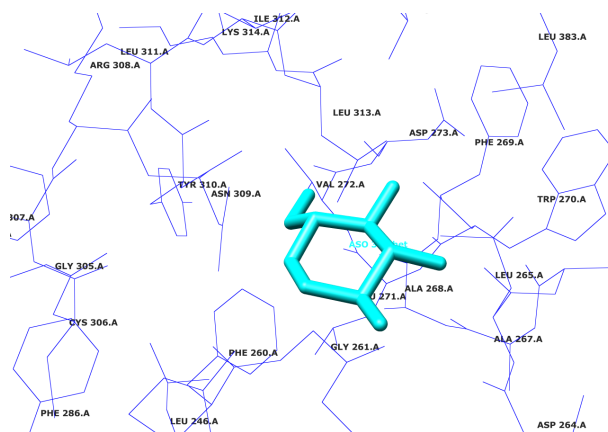



# 2cgr

source: *Mus musculus*

protein: Immunoglobulin Igg2b-kappa Fab fragment

ligand: GAS antigen

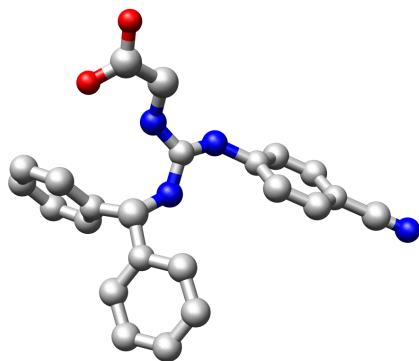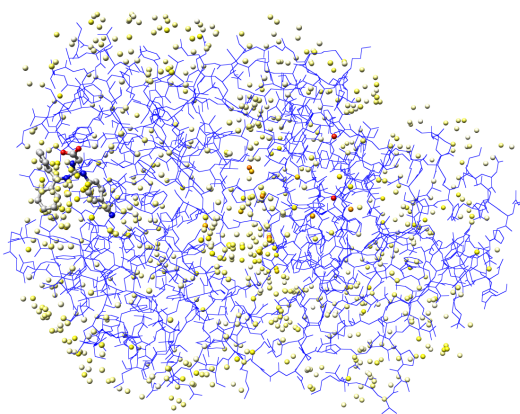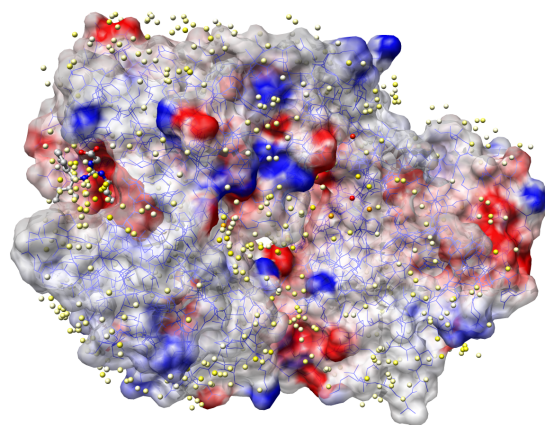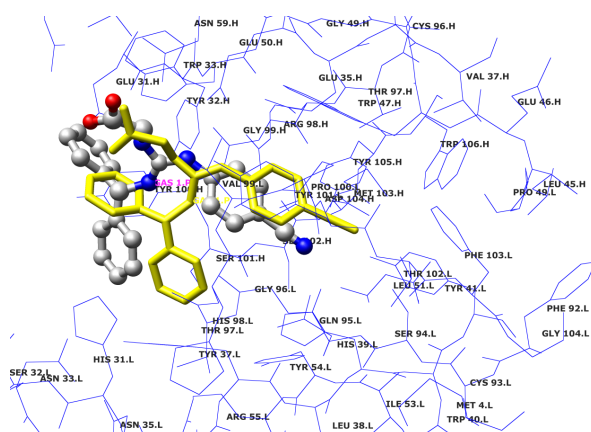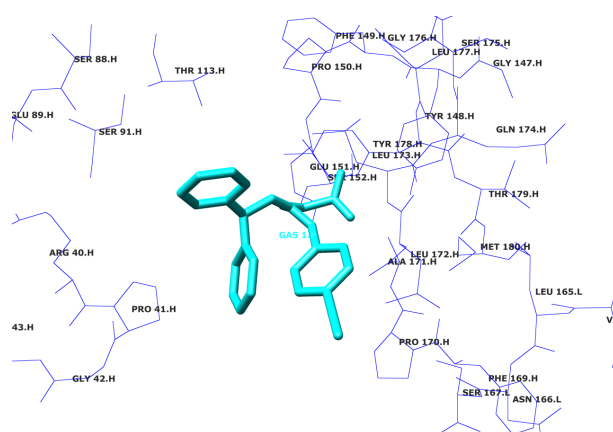

# 2cmd

source: *Escherichia coli*

protein: Malate dehydrogenase

ligand: CIT substrate analogue

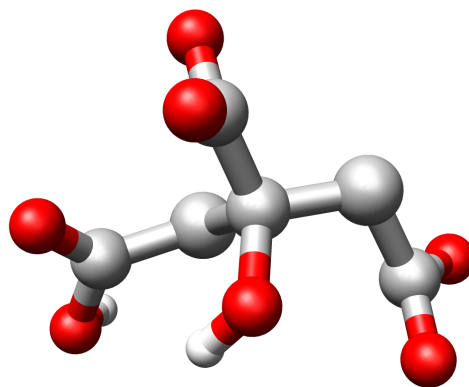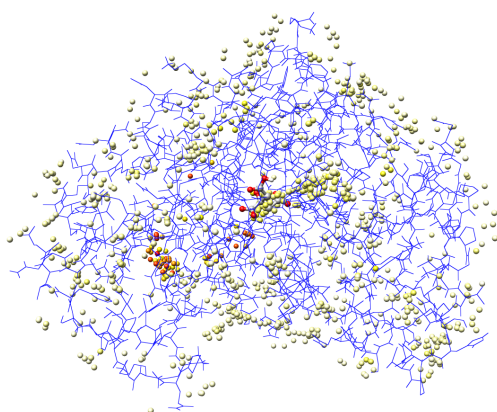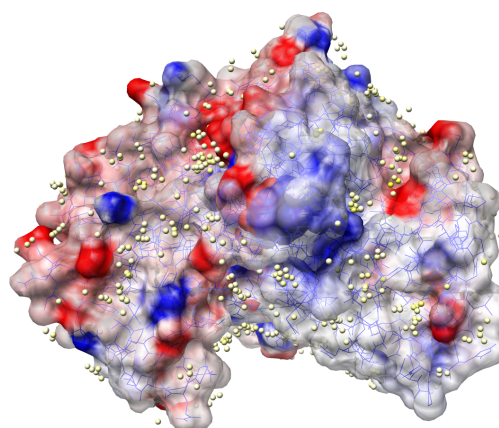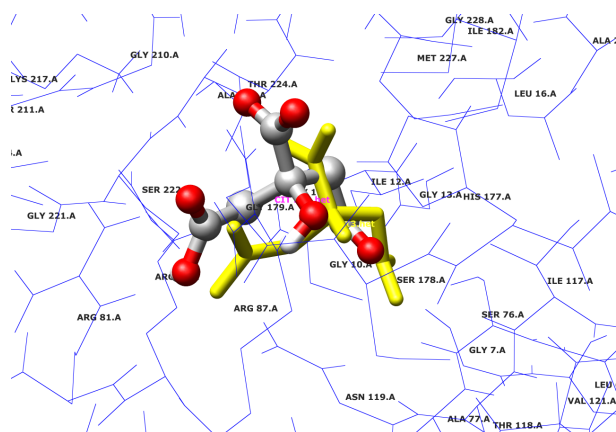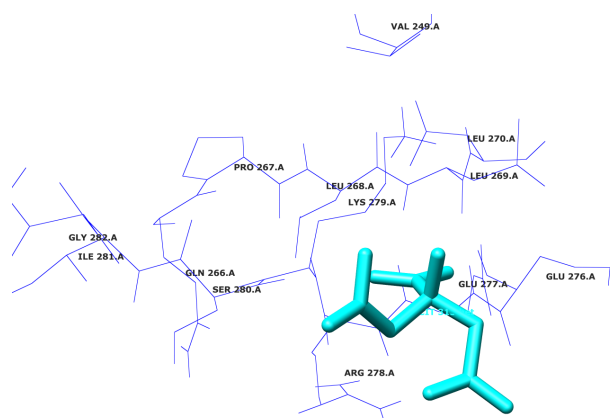

# 2ctc

source: *Bos taurus*

protein: Carboxypeptidase A

ligand: HFA inhibitor

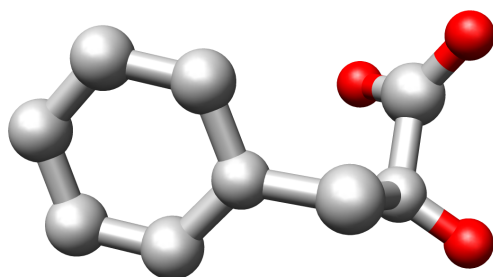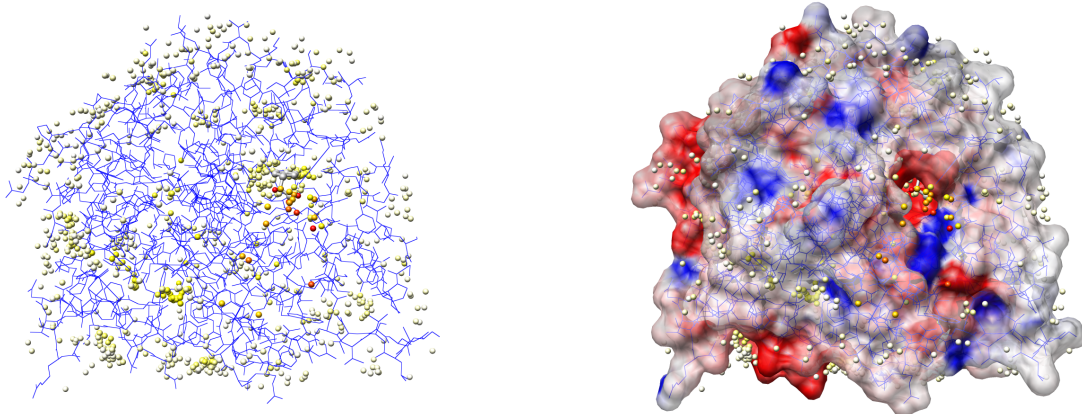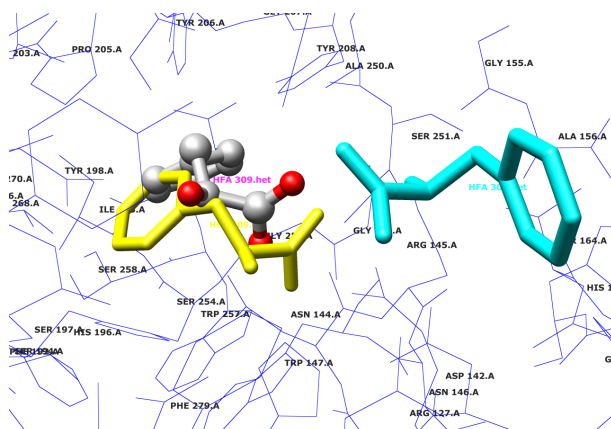

# 2gbp

source: *Escherichia coli*

protein: D-galactose/d-glucose binding protein

ligand: GLU glucose

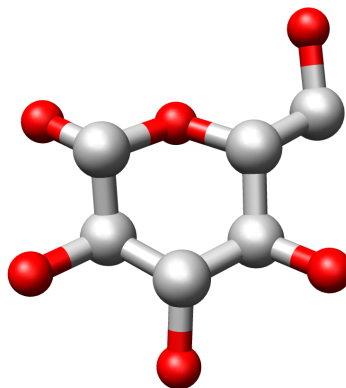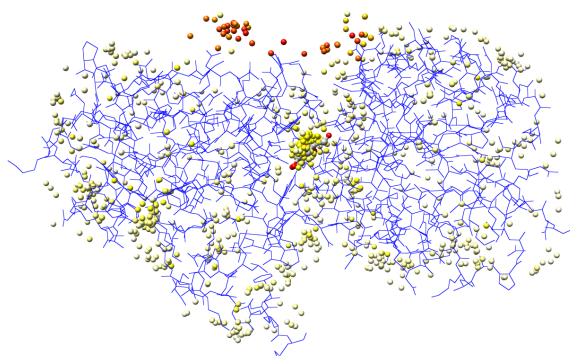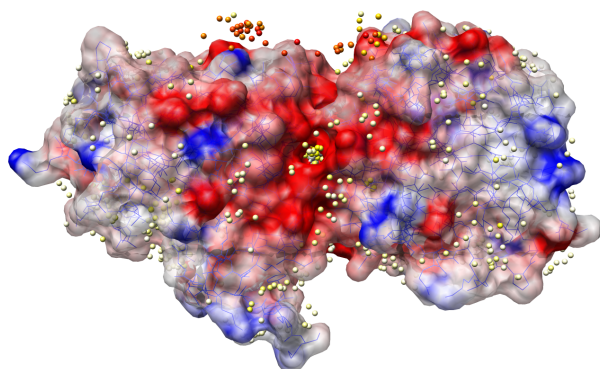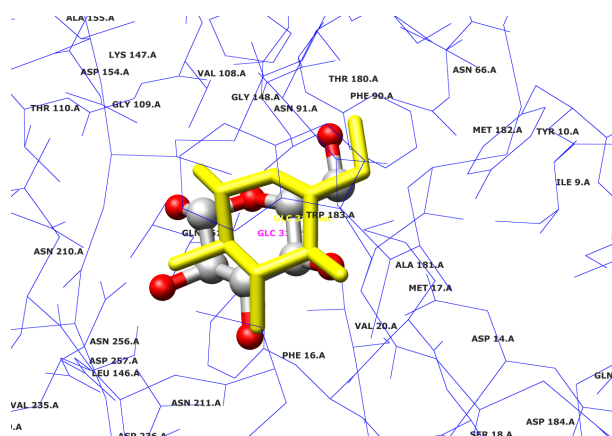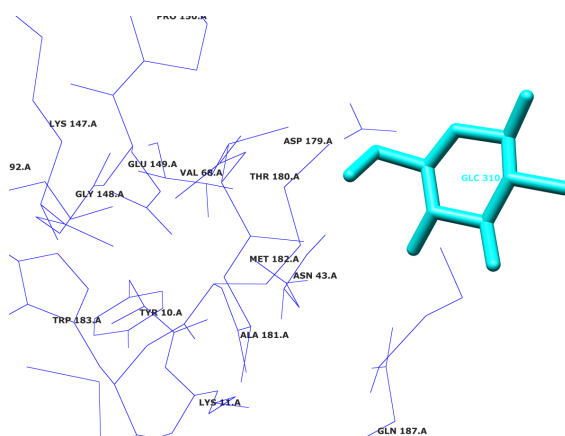

# 2pjh

source: *Pseudomonas fluorescens*

protein: P-hydroxybenzoate hydroxylase

ligand: PHB substrate

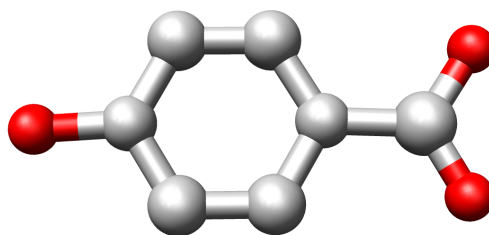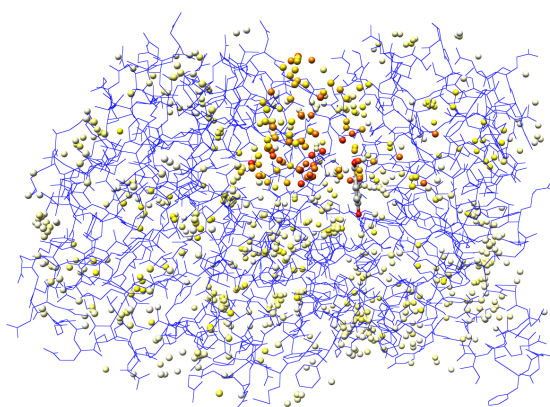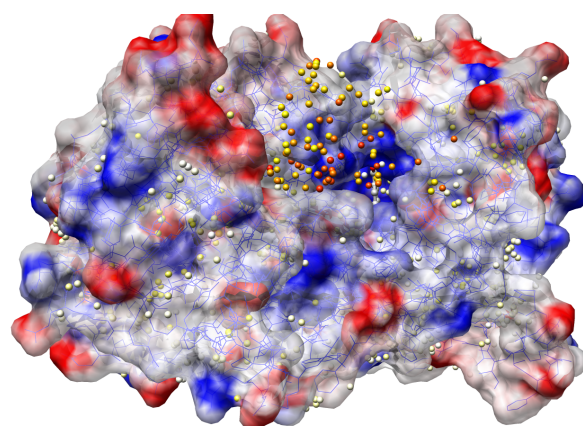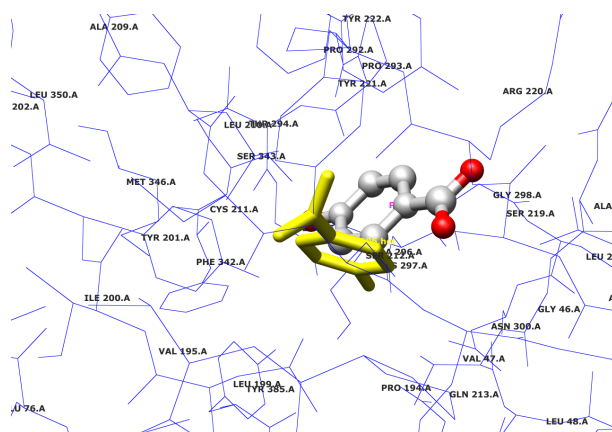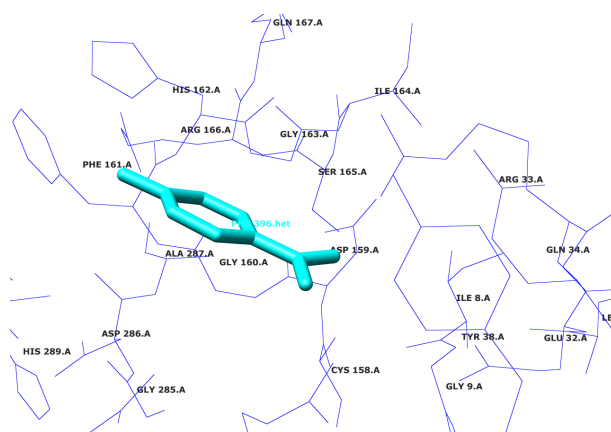

## 2sim

source: *Salmonella typhimurium*

protein: Sialidase

ligand: DAN transition-state analogue

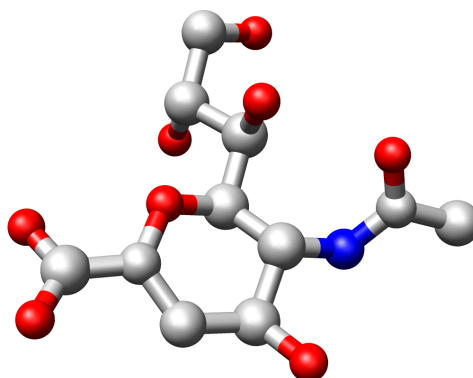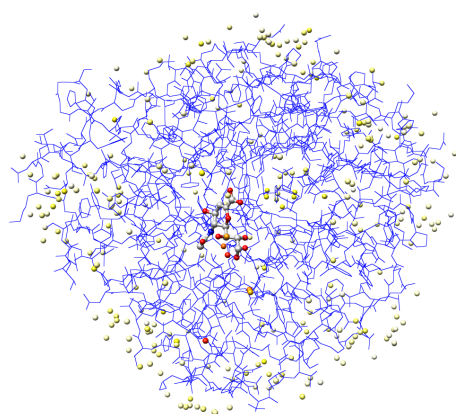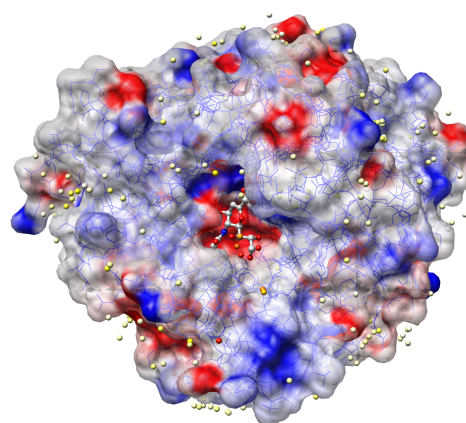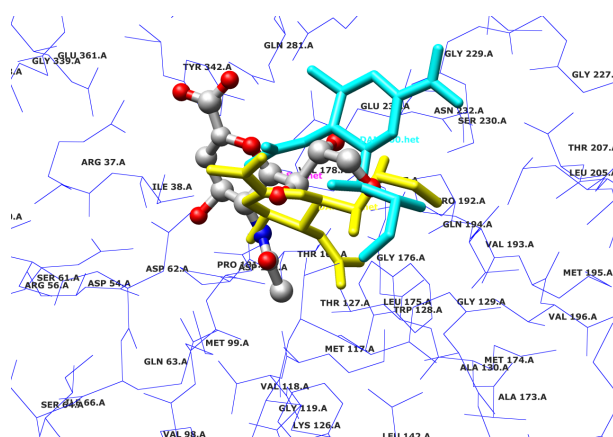

# 3cpa

source: *Bos taurus*

protein: Carboxypeptidase A

ligand: GLY-TYR substrate

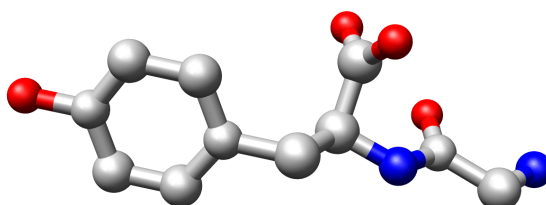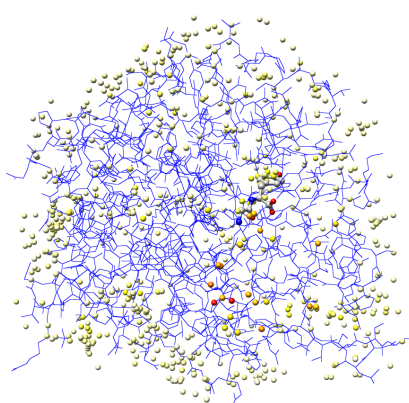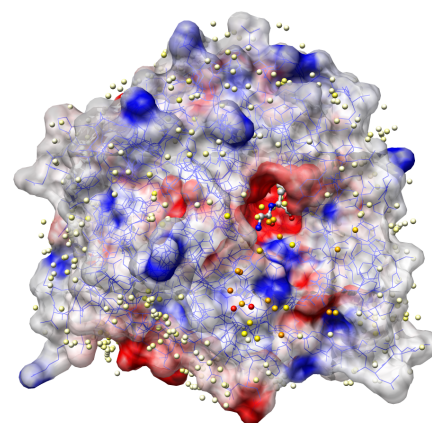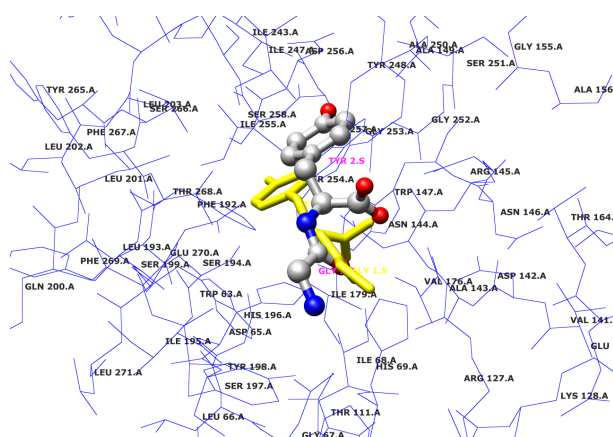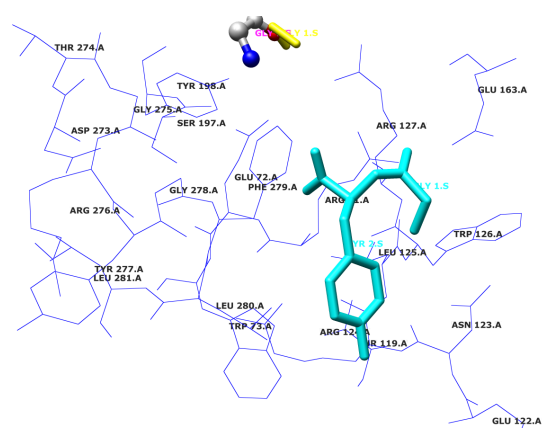

# 3ptb

source: *Bos taurus*

protein: Trypsin

ligand: BEN inhibitor

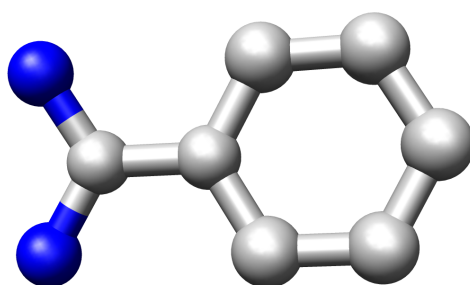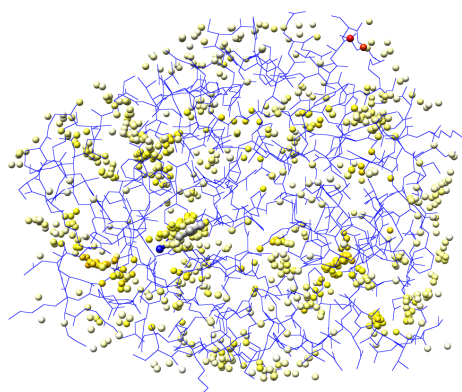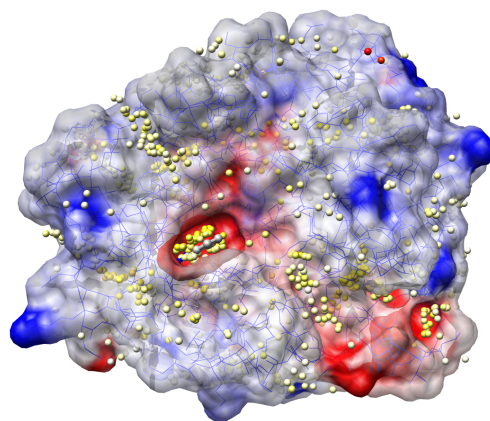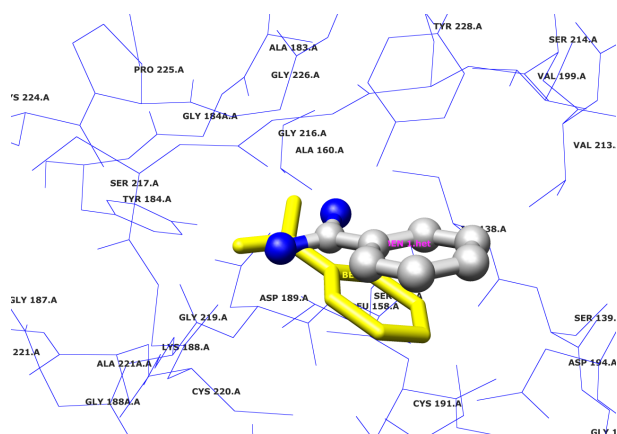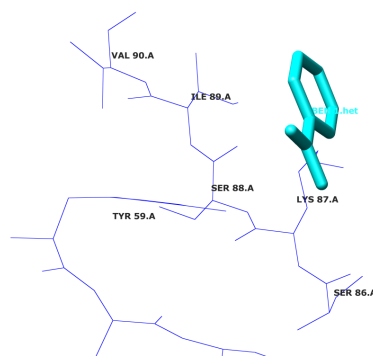



# 3tpi

source: *Bos taurus*

protein: Tripsinogen

ligand: ILE-VAL dipeptide

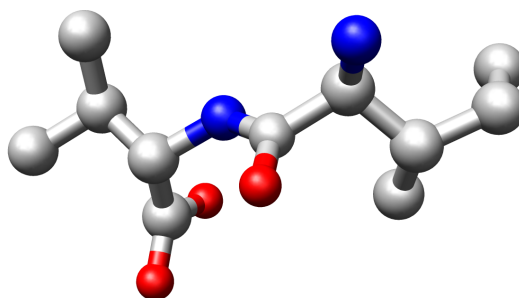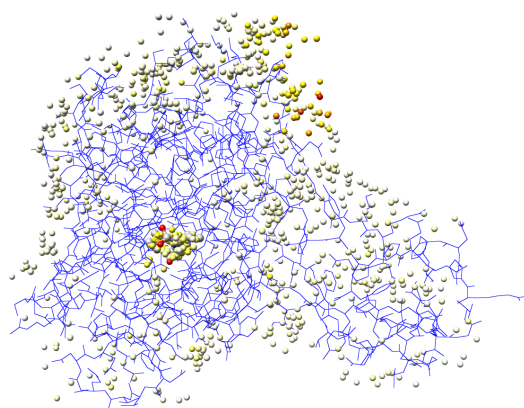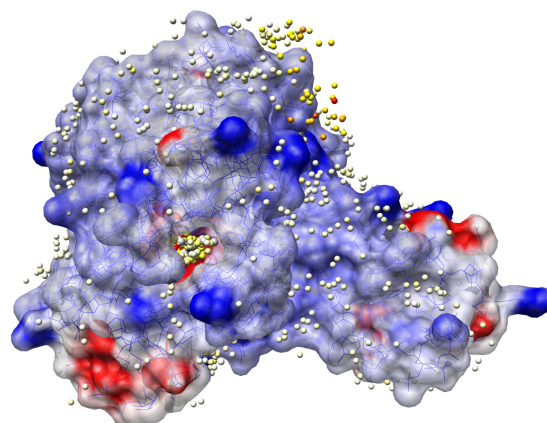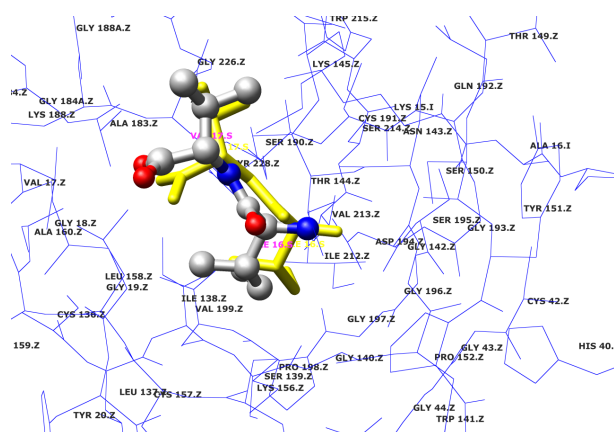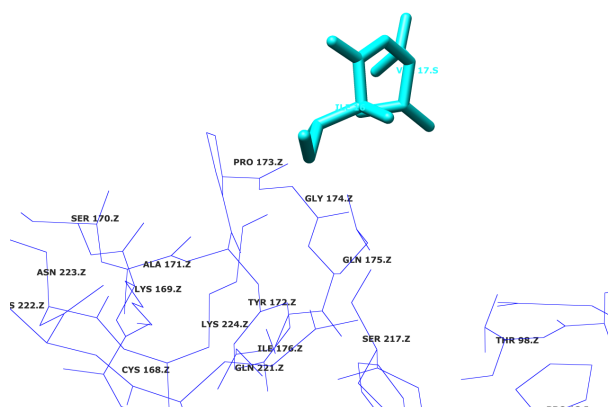

# 4dfr

source: *Escherichia coli*

protein: Dihydrofolate reductase

ligand: MTX methotrexate

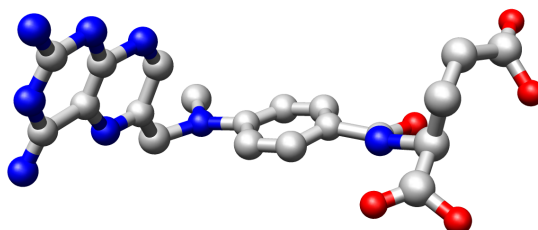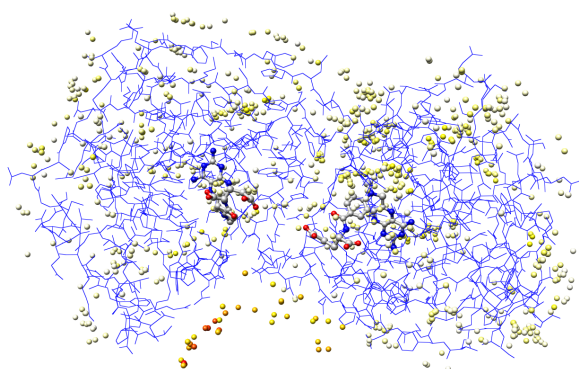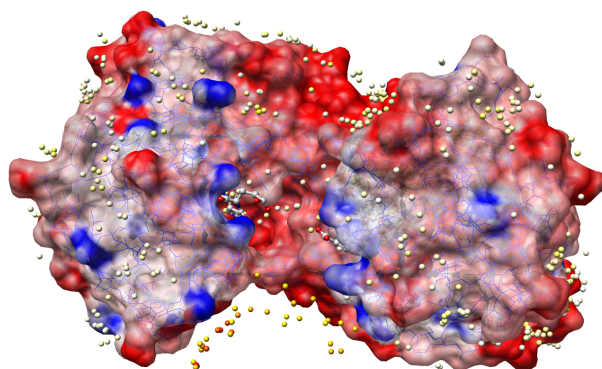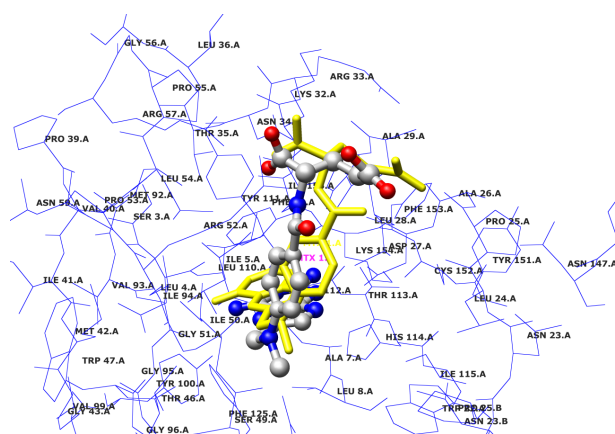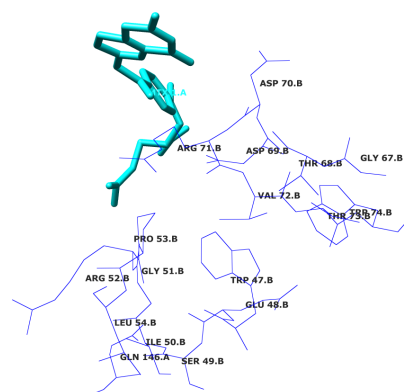

# 8gch

source: *Bos taurus*

protein: Gamma-chymotrypsin

ligand: GLY-ALA-TRP product

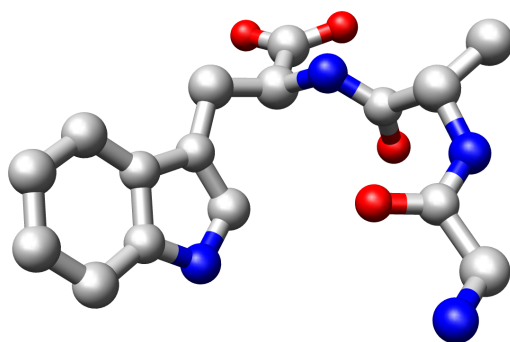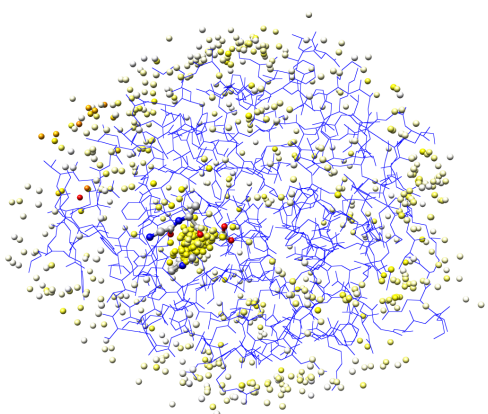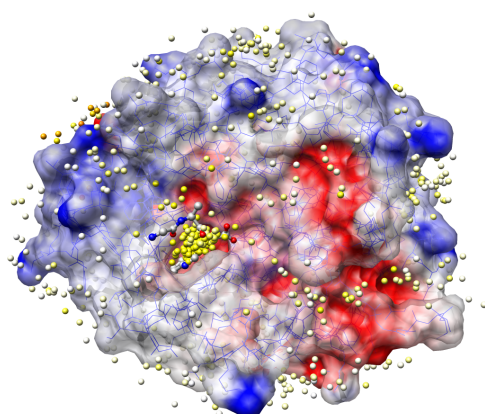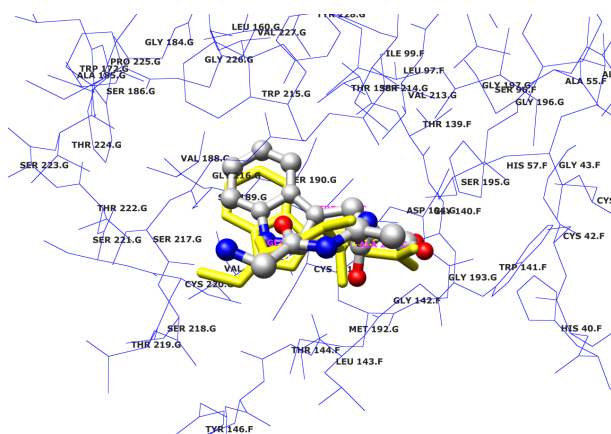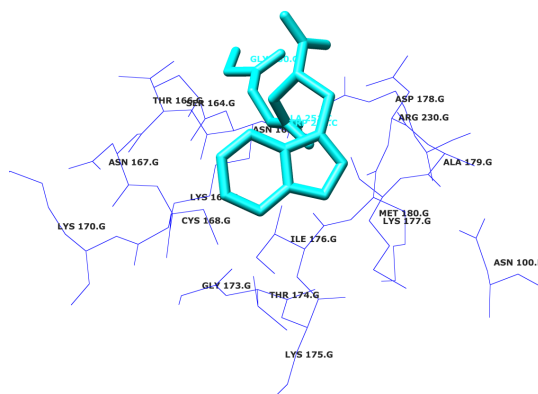

Supplement: supp_data.pdf [file supp_data.pdf]
